# Supplementary material for: Eight coordinated mononuclear dysprosium complexes of heptadentate aminophenol ligands: the influence of the phenol substituents and the ancillary donors on the magnetic relaxation
Source: Royal Society of Chemistry journal article supplement (doi:10.1039/d1dt02756e), 2021-01-01
Supplement: d1dt02756e1.pdf [file d1dt02756e1.pdf]

## Supplementary material

### **Eight coordinated mononuclear dysprosium complexes of heptadentate aminophenol ligands: the influence of the phenol substituents and the ancillary donors on the magnetic relaxation**

Matilde Fondo,<sup>a,\*</sup> Julio Corredoira-Vázquez,<sup>a</sup> Ana M. García-Deibe,<sup>a</sup> Jesús Sanmartín-Matalobos,<sup>a</sup> Daniel Reta,<sup>b</sup> and Enrique Colacio<sup>c</sup>

<sup>a</sup> Departamento de Química Inorgánica, Facultade de Química, Universidade de Santiago de Compostela, Campus Vida, 15782 Santiago de Compostela, Spain.

<sup>b</sup> Departament de Química Inorgànica i Orgànica, Universitat de Barcelona, Diagonal 645, 08028 Barcelona, Spain

<sup>c</sup> Departamento de Química Inorgánica, Facultad de Ciencias, Universidad de Granada, Avda Fuentenueva s/n, 18071 Granada, Spain

|                                                                                                                                                                                                                                                                                                                                                                   |          |
|-------------------------------------------------------------------------------------------------------------------------------------------------------------------------------------------------------------------------------------------------------------------------------------------------------------------------------------------------------------------|----------|
| <b>Fig. S1</b> Comparison of X-powder diffractogram for the crystalline sample of <b>1Py</b> (blue line) with the simulated one from single X-ray data (red line)                                                                                                                                                                                                 | page S4  |
| <b>Fig. S2</b> Ellipsoid (50% probability) diagram for <b>1Py</b> .                                                                                                                                                                                                                                                                                               | page S4  |
| <b>Fig. S3.</b> Ellipsoid (50% probability) diagram for <b>2W.2</b> .                                                                                                                                                                                                                                                                                             | page S5  |
| <b>Fig. S4</b> Ellipsoid (50% probability) diagram for <b>3M.1</b> .                                                                                                                                                                                                                                                                                              | page S5  |
| <b>Fig. S5</b> $\chi_M T$ vs $T$ for <b>1W</b> ·0.25MeOH (left) and <b>2W</b> ·(right). Insets: $M/N\mu_B$ vs $H$ . The solid red and green lines (that nearly superimpose) represent the theoretical data obtained from <i>ab initio</i> calculations (with CASSF-SO methodology) for <b>1W.1</b> and <b>1W.2</b> or <b>2W.1</b> and <b>2W.2</b> , respectively. | page S6  |
| <b>Fig. S6</b> Frequency dependence of $\chi''_M$ at different temperatures in $H_{dc} = 0$ for <b>2W</b>                                                                                                                                                                                                                                                         | page S6  |
| <b>Fig. S7</b> Arrhenius plot in $H_{dc} = 0$ for: left) <b>1W</b> ·0.25MeOH; right) <b>1Py</b> . The red solid lines account for the best fit considering only Orbach relaxation (red) in the linear region.                                                                                                                                                     | page S6  |
| <b>Fig. S8</b> Cole–Cole plot for <b>1W</b> ·0.25MeOH (left) and <b>1Py</b> ·(right) in zero field.                                                                                                                                                                                                                                                               | page S7  |
| <b>Fig. S9.</b> Temperature dependence of $\chi''_M$ at different frequencies in $H_{dc} = 0$ Oe for <b>1W</b> ·0.25MeOH (left) and <b>1Py</b> ·(right).                                                                                                                                                                                                          | page S7  |
| <b>Fig. S10</b> Field dependence of the magnetic relaxation time at 2.5 K for <b>1W</b> ·0.25MeOH (left up), <b>1Py</b> (right up) and <b>2W</b> ( middle botton).                                                                                                                                                                                                | page S7  |
| <b>Fig. S11</b> Cole–Cole plot at 1000 Oe dc field for <b>1W</b> ·0.25MeOH (left up), <b>1Py</b> (right up) and <b>2W</b> (middle botton).                                                                                                                                                                                                                        | page S8  |
| <b>Fig. S12</b> Temperature dependence of $c''_M$ at different frequencies in $H_{dc} = 1000$ Oe for <b>1W</b> ·0.25MeOH (left up), <b>1Py</b> ·(right up) and <b>2W</b> ·(middle bottom).                                                                                                                                                                        | page S8  |
| <b>Fig. S13</b> Frequency dependence of $c''_M$ at different temperatures in zero dc field for: <b>1W@Y</b> (left up), <b>1Py@Y</b> (right up) and <b>2W@Y</b> (middle bottom).                                                                                                                                                                                   | page S9  |
| <b>Fig. S14</b> Temperature dependence of $c''_M$ at different frequencies in $H_{dc} = 0$ Oe for <b>1W@Y</b> (left up), <b>1Py@Y</b> ·(right up) and <b>2W@Y</b> (middle bottom).                                                                                                                                                                                | page S9  |
| <b>Fig. S15</b> T Arrhenius plot in $H_{dc} = 0$ in $H_{dc} = 0$ Oe for <b>1W@Y</b> (left up), <b>1Py@Y</b> (right up) and <b>2W@Y</b> (middle bottom).                                                                                                                                                                                                           | page S10 |
| <b>Fig. S16.</b> Comparison of crystal (red) and optimized (blue) structures viewed from the side (left) and top (right). <b>1Py</b> , <b>1W</b> and <b>2W</b> are shown in top, middle and bottom, respectively.                                                                                                                                                 | page S11 |
| <b>Table S1.</b> Crystal data and structure refinement for <b>1W</b> ·0.25MeOH, <b>1Py</b> , <b>2W</b> ·2CH <sub>3</sub> C <sub>6</sub> H <sub>5</sub> and <b>3M</b> ·CH <sub>3</sub> C <sub>6</sub> H <sub>5</sub> .                                                                                                                                             | page S13 |
| <b>Table S2.</b> Main distances (Å) and angles (°) for <b>1W</b> ·0.25MeOH, <b>1Py</b> and <b>2W</b> ·2CH <sub>3</sub> C <sub>6</sub> H <sub>5</sub>                                                                                                                                                                                                              | page S14 |
| <b>Table S3.</b> SHAPE v2.1. Continuous Shape Measures calculation (c) 2013 Electronic Structure Group, Universitat de Barcelona                                                                                                                                                                                                                                  | page S14 |

- Table S4.** Main distances (Å) and angles (°) for **3M**·2CH<sub>3</sub>C<sub>6</sub>H<sub>5</sub>. page S15
- Table S5.** Generalised Debye model fitting parameters for **1W**·0.25MeOH-**2W** and **1W@Y-2W@Y** page S16
- Table S6.** Electronic structure of **1W** complexes calculated with the crystal field parameters obtained from CASSCF-SO at the crystal structure. Each row corresponds to a Kramers doublet. Last column reports the CASSCF-SO energies. page S20
- Table S7.** Electronic structure of **1W** complexes calculated with the crystal field parameters obtained from CASSCF-SO at the DFT-optimised structure. Each row corresponds to a Kramers doublet. Last column reports the CASSCF-SO energies. page S22
- Table S8.** Electronic structure of **1Py** complex calculated with the crystal field parameters obtained from CASSCF-SO at the crystal structure. Each row corresponds to a Kramers doublet. Last column reports the CASSCF-SO energies. page S23
- Table S9.** Electronic structure of **1Py** complex calculated with the crystal field parameters obtained from CASSCF-SO at the DFT-optimised structure. Each row corresponds to a Kramers doublet. Last column reports the CASSCF-SO energies. page S24
- Table S10.** Electronic structure of **2W** complexes calculated with the crystal field parameters obtained from CASSCF-SO at the crystal structure. Each row corresponds to a Kramers doublet. Last column reports the CASSCF-SO energies. page S25
- Table S11.** Electronic structure of **2W** complexes calculated with the crystal field parameters obtained from CASSCF-SO at the DFT-optimized structure. Each row corresponds to a Kramers doublet. Last column reports the CASSCF-SO energies. page S28
- Table S12.** Root mean squared deviation values\*, between pairs of crystal and optimized coordinates. page S29

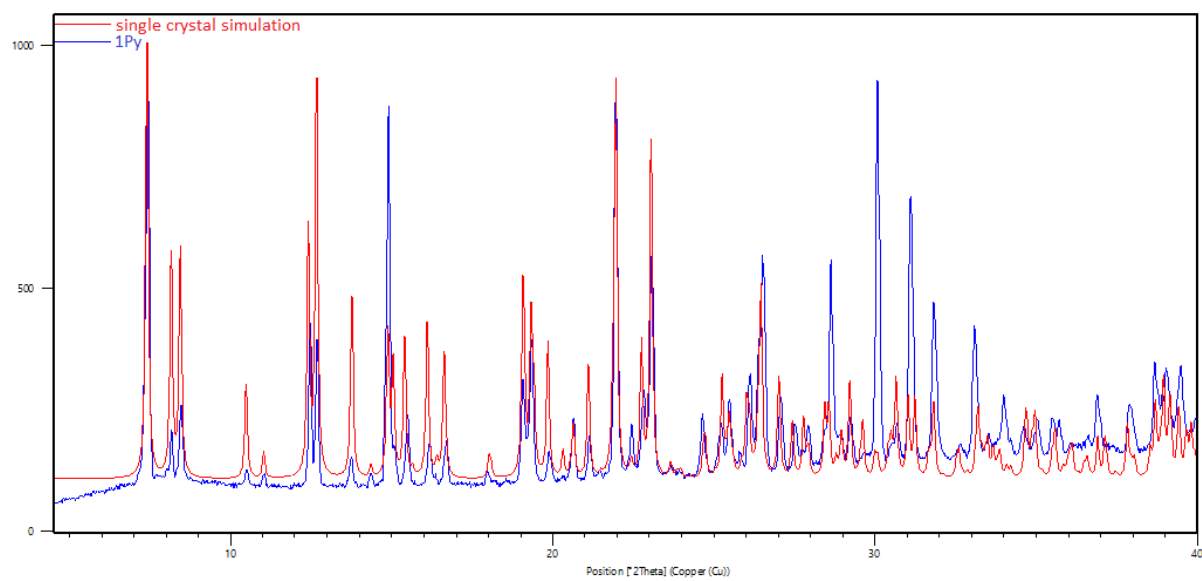

**Fig. S1** Comparison of X-powder diffractogram for the crystalline sample of **1Py** (blue line) with the simulated one from single X-ray data (red line).

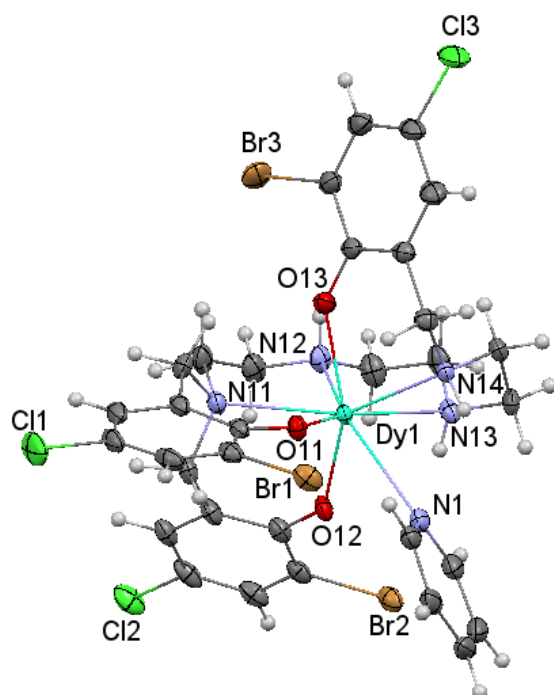

**Fig. S2** Ellipsoid (50% probability) diagram for **1Py**.

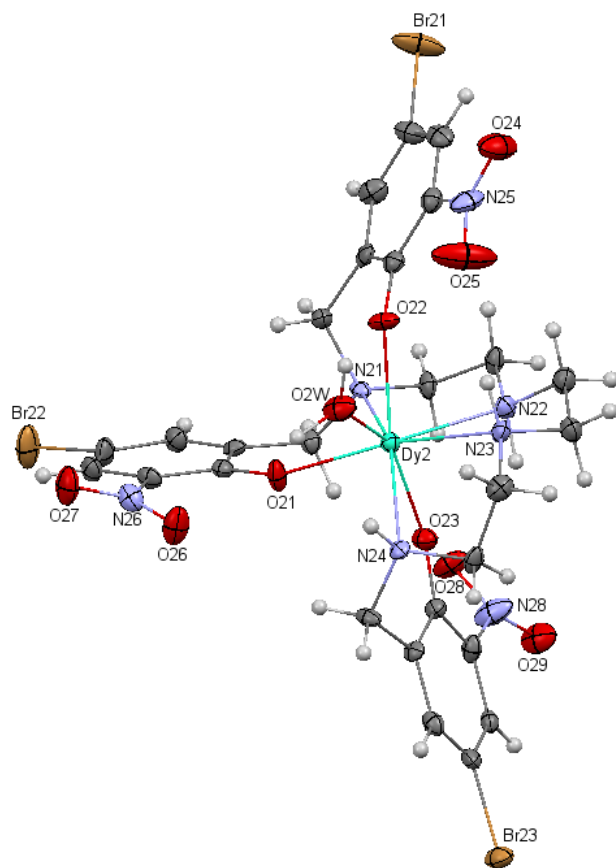

**Fig. S3** Ellipsoid (50% probability) diagram for **2W.2**.

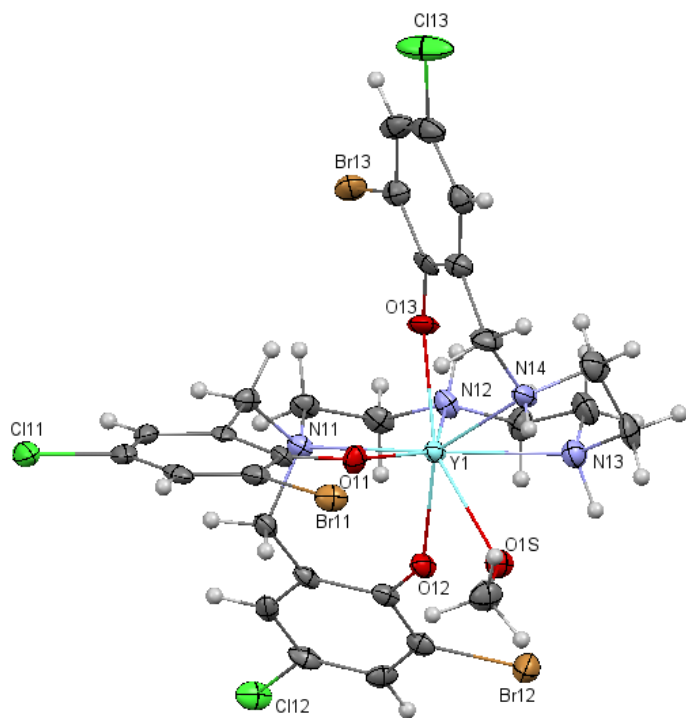

**Fig. S4** Ellipsoid (50% probability) diagram for **3M.1**.

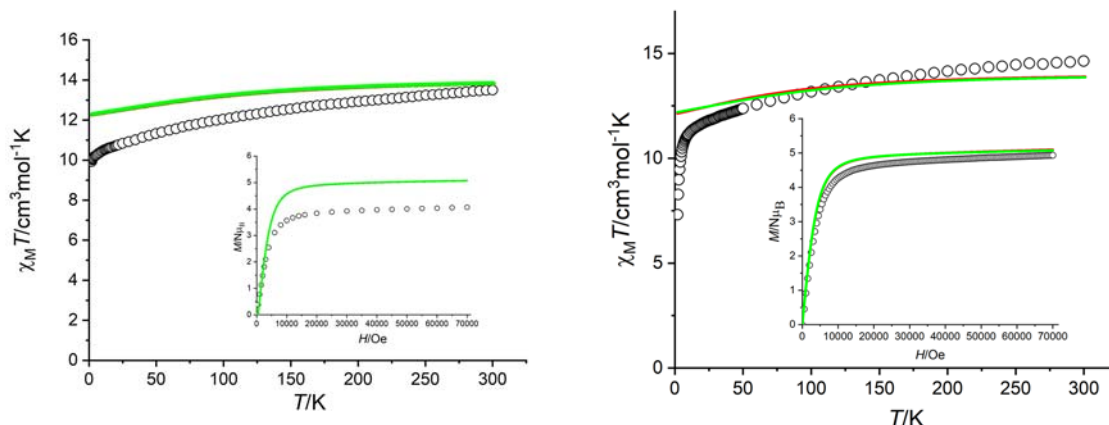

**Fig. S5**  $\chi_M T$  vs  $T$  for **1W**·0.25MeOH (left) and **2W** (right). Insets:  $M/N\mu_B$  vs  $H$  at 2 K. The solid red and green lines (that nearly superimpose) represent the theoretical data obtained from *ab initio* calculations (with CASSF-SO methodology) for **1W.1** and **1W.2** or **2W.1** and **2W.2**, respectively.

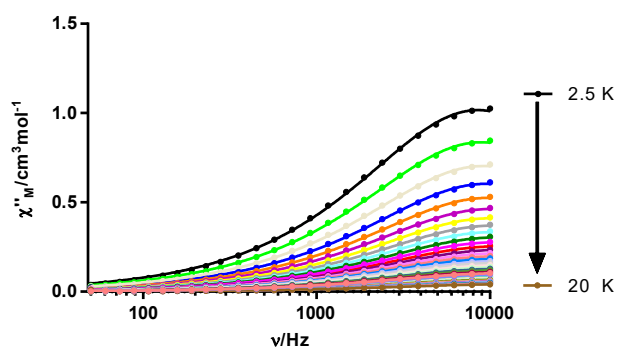

**Fig. S6** Frequency dependence of  $\chi''_M$  at different temperatures in  $H_{dc} = 0$  for **2W**.

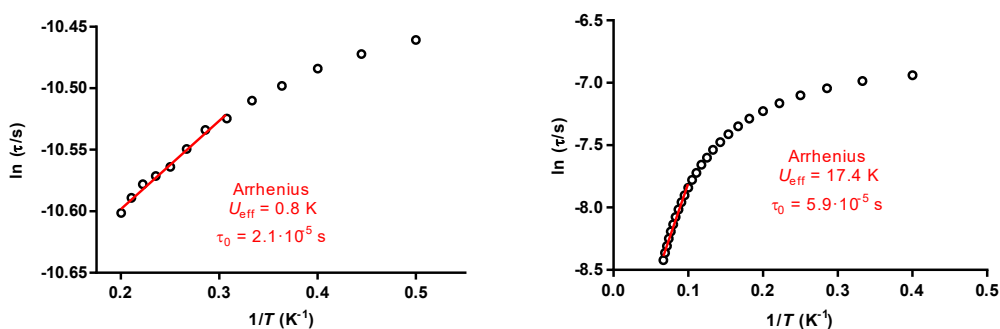

**Fig. S7** Arrhenius plot in  $H_{dc} = 0$  for **1W**·0.25MeOH(left) and **1Py** (right). The red solid lines account for the best fit considering only Orbach relaxation (red) in the linear region.

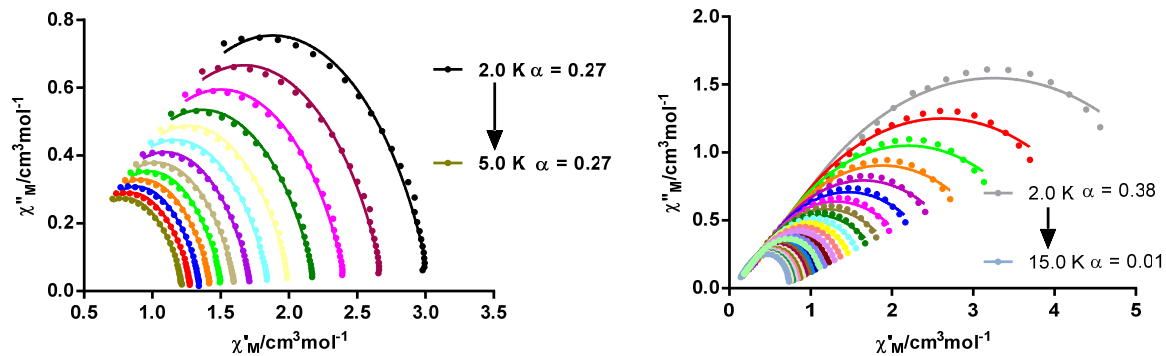

**Fig. S8** Cole–Cole plot for **1W-0.25MeOH** (left) and **1Py** (right) in zero field.

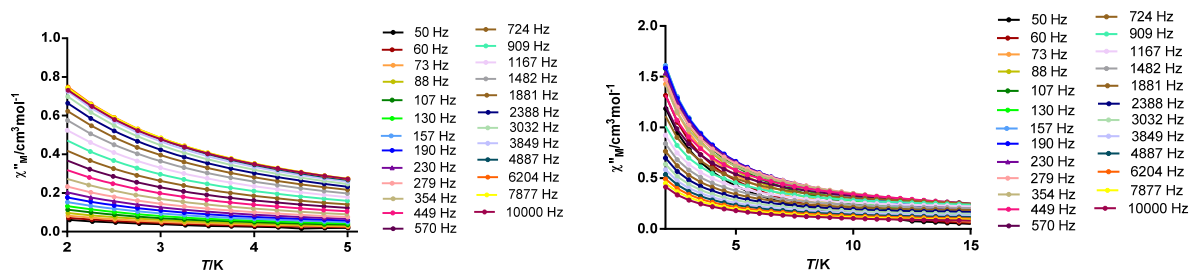

**Fig. S9** Temperature dependence of  $\chi''_M$  at different frequencies in  $H_{dc} = 0$  Oe for **1W-0.25MeOH** (left) and **1Py** (right).

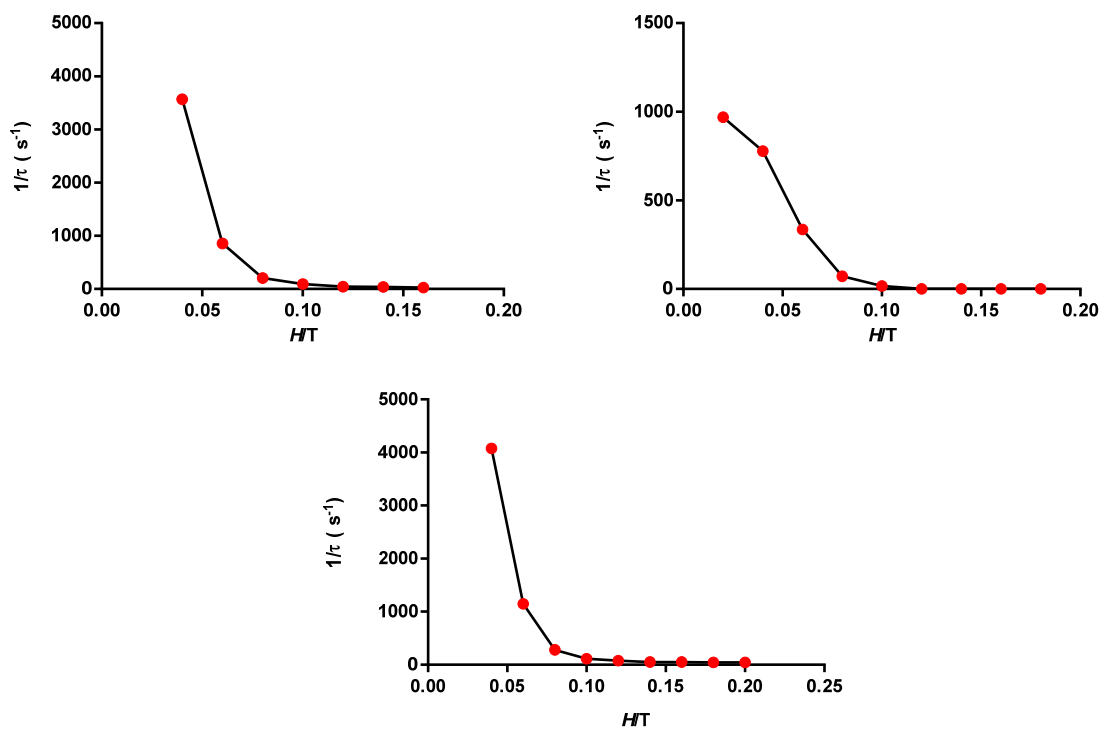

**Fig. S10** Field dependence of the magnetic relaxation time at 2.5 K for **1W-0.25MeOH** (left up), **1Py** (right up) and **2W** (middle bottom).

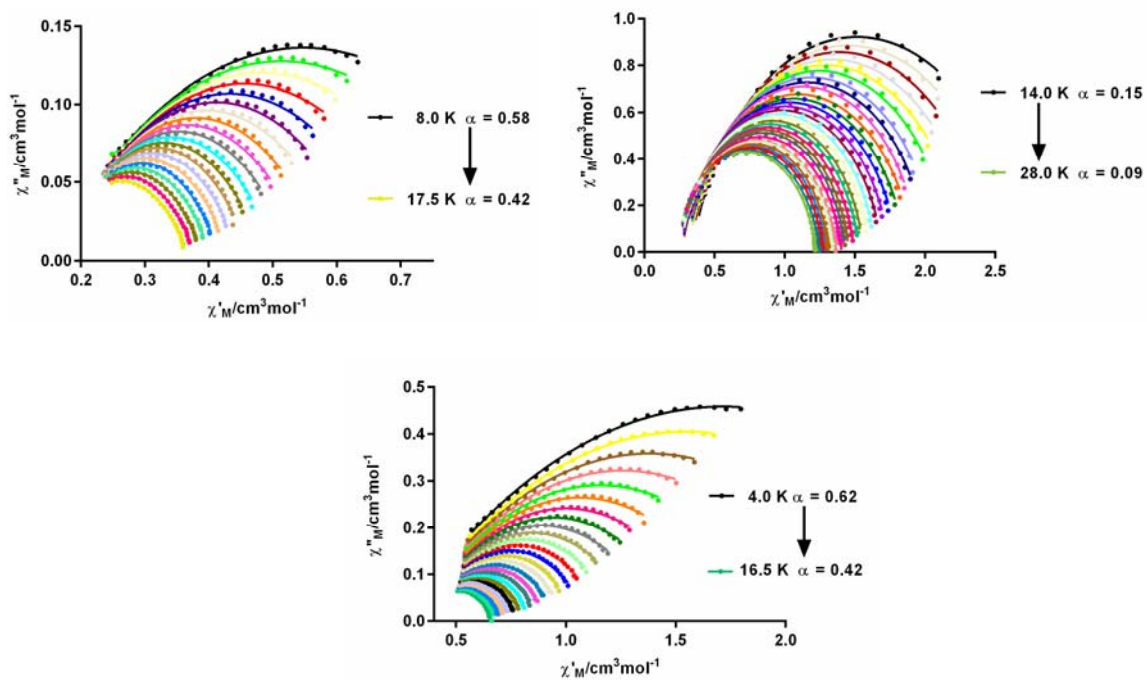

**Fig. S11** Cole–Cole plot at 1000 Oe dc field for **1W**-0.25MeOH (left up), **1Py** (right up) and **2W** (middle bottom).

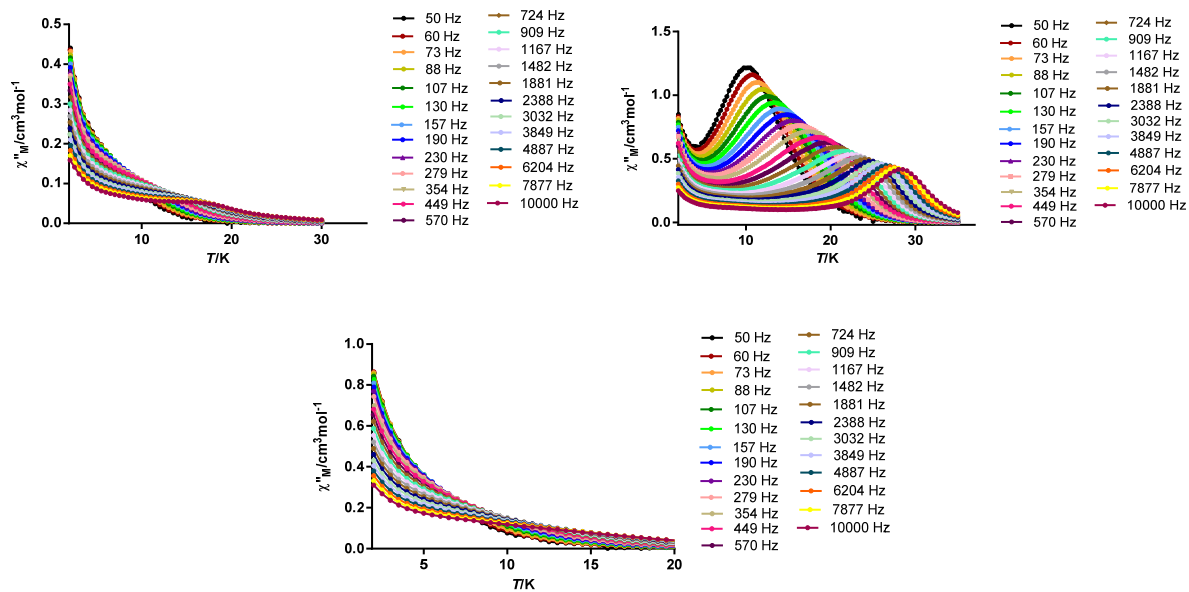

**Fig. S12** Temperature dependence of  $\chi''_M$  at different frequencies in  $H_{dc} = 1000$  Oe for **1W**-0.25MeOH (left up), **1Py** (right up) and **2W** (middle bottom).



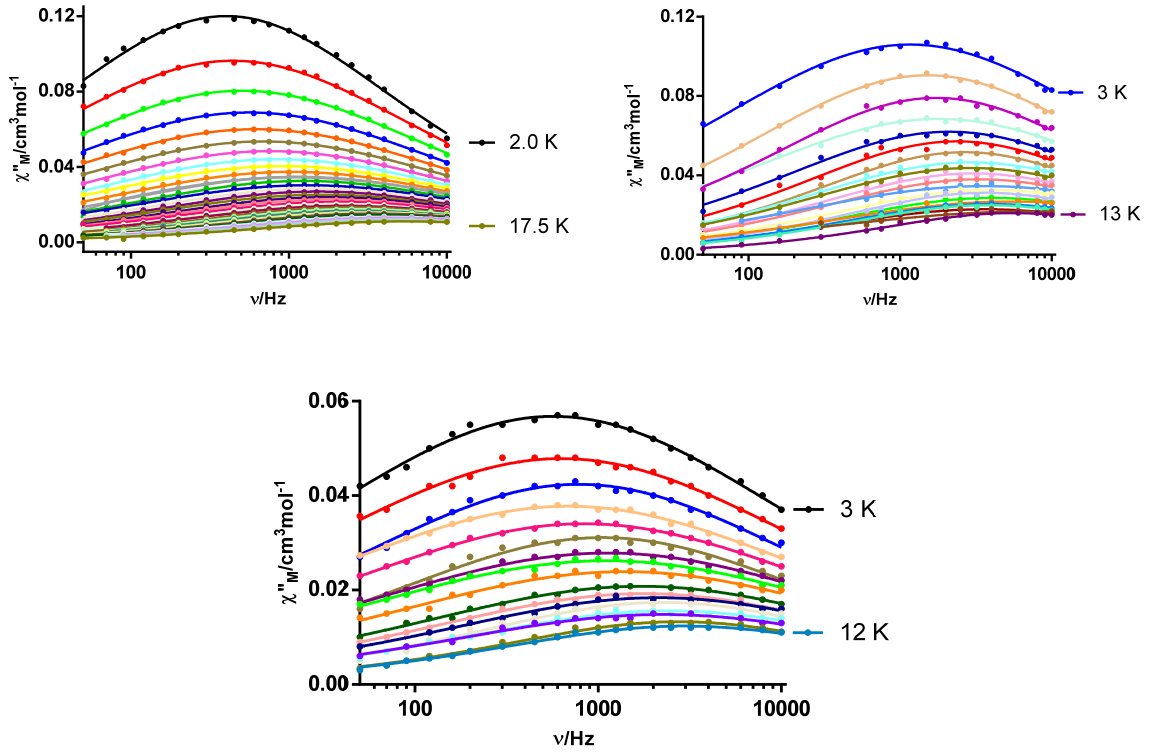

**Fig.S13** Frequency dependence of  $\chi''_M$  at different temperatures in zero dc field for: **1W@Y** (left up), **1Py@Y** (right up) and **2W@Y** (middle bottom).

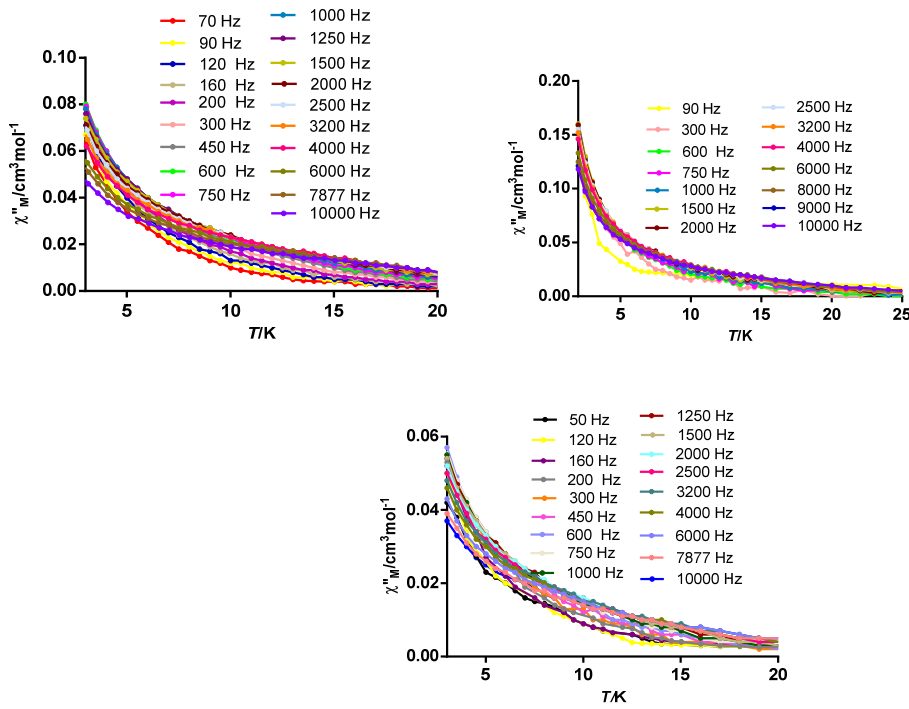

**Fig. S14** Temperature dependence of  $\chi''_M$  at different frequencies in  $H_{dc} = 0$  Oe for **1W@Y** (left up), **1Py@Y** (right up) and **2W@Y** (middle bottom).

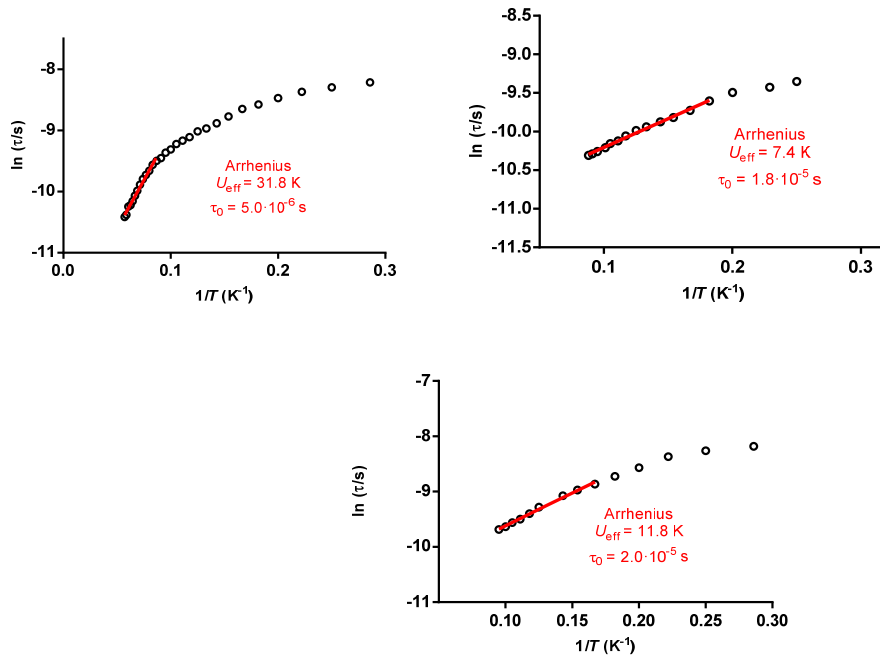

**Fig. S15** T Arrhenius plot in  $H_{dc} = 0 \text{ Oe}$  for **1W@Y** (left up), **1Py@Y** (right up) and **2W@Y** (middle bottom).

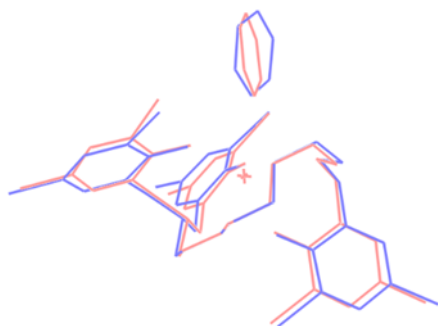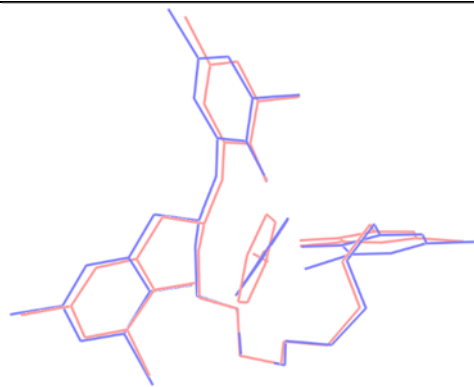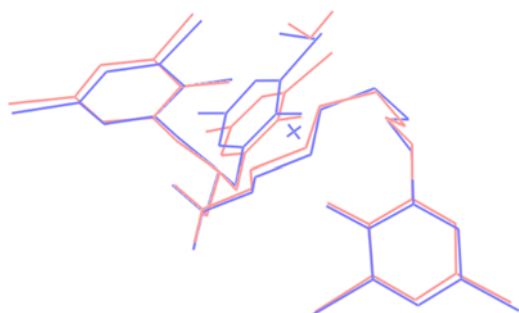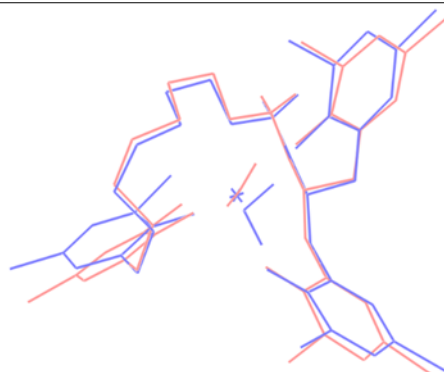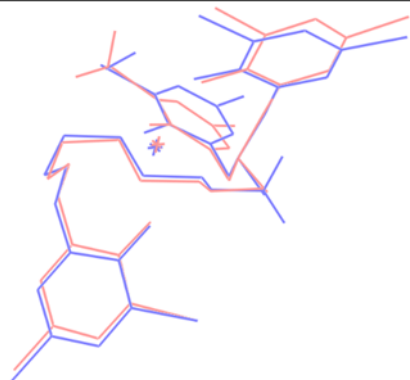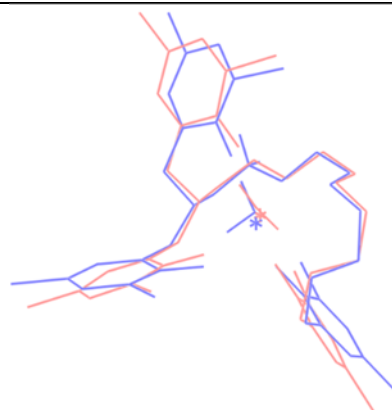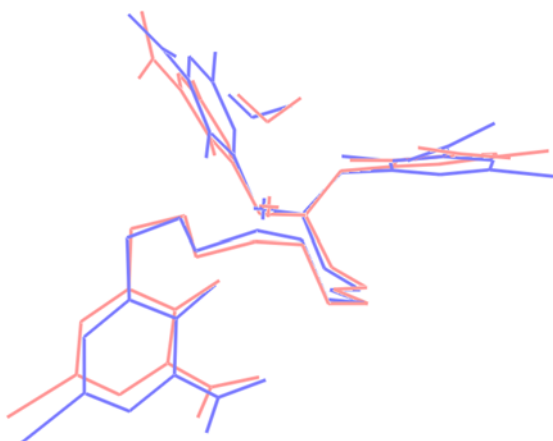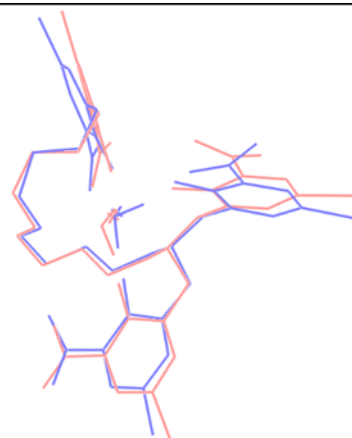

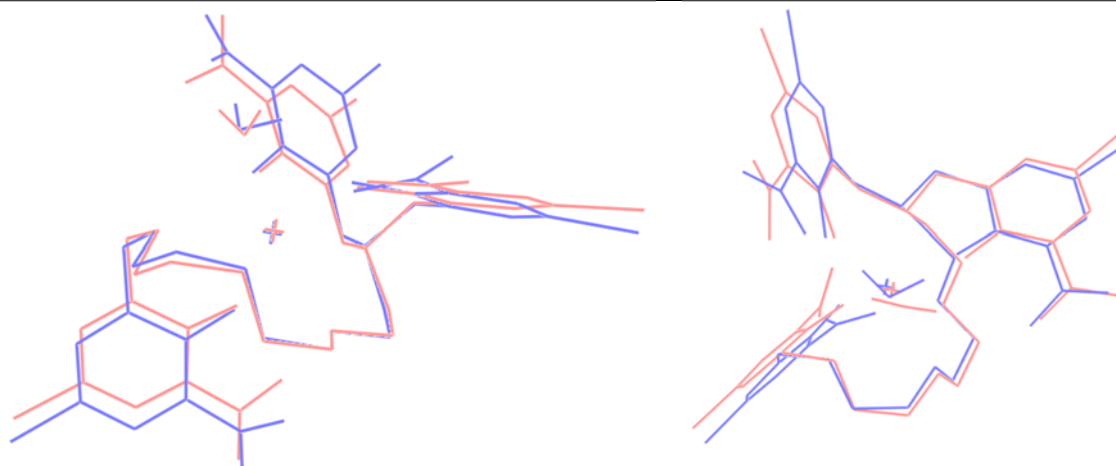

**Fig. S16.** Comparison of crystal (red) and optimized (blue) structures viewed from the side (left) and top (right). **1Py**, **1W.1**, **1W.2**, **2W.1** and **2W.2** are shown in top, middle and bottom panels, respectively.

**Table S1.** Crystal data and structure refinement for **1W**·0.25MeOH, **1Py**, **2W**·2CH<sub>3</sub>C<sub>6</sub>H<sub>5</sub> and **3M**·CH<sub>3</sub>C<sub>6</sub>H<sub>5</sub>

|                                              | <b>1W</b> ·0.25MeOH                                                                                  | <b>1Py</b>                                                                                      | <b>2W</b> ·2CH <sub>3</sub> C <sub>6</sub> H <sub>5</sub>                        | <b>3M</b> ·CH <sub>3</sub> C <sub>6</sub> H <sub>5</sub>                                        |
|----------------------------------------------|------------------------------------------------------------------------------------------------------|-------------------------------------------------------------------------------------------------|----------------------------------------------------------------------------------|-------------------------------------------------------------------------------------------------|
| Empirical formula                            | C <sub>27.5</sub> H <sub>30</sub> Br <sub>3</sub> Cl <sub>3</sub> DyN <sub>4</sub> O <sub>4.25</sub> | C <sub>32</sub> H <sub>32</sub> Br <sub>3</sub> Cl <sub>3</sub> DyN <sub>5</sub> O <sub>3</sub> | C <sub>41</sub> H <sub>45</sub> Br <sub>3</sub> DyN <sub>7</sub> O <sub>10</sub> | C <sub>35</sub> H <sub>39</sub> Br <sub>3</sub> Cl <sub>3</sub> N <sub>4</sub> O <sub>4</sub> Y |
| Molecular weight                             | 990.13                                                                                               | 1043.20                                                                                         | 1198.07                                                                          | 1014.69                                                                                         |
| Crystal system                               | Monoclinic                                                                                           | Orthorhombic                                                                                    | Orthorhombic                                                                     | Orthorhombic                                                                                    |
| Space group                                  | P2 <sub>1</sub> /c                                                                                   | Pna2 <sub>1</sub>                                                                               | Pbca                                                                             | P2 <sub>1</sub> 2 <sub>1</sub> 2 <sub>1</sub>                                                   |
| Wavelength (Å)                               | 0.71073                                                                                              | 0.71073                                                                                         | 0.71073                                                                          | 0.71073                                                                                         |
| Crystal size (mm <sup>3</sup> )              | 0.178 x 0.087 x 0.022                                                                                | 0.190 x 0.150 x 0.090                                                                           | 0.080x 0.040 x 0.020                                                             | 0.100x 0.050 x 0.030                                                                            |
| Color, shape                                 | Needle, colorless                                                                                    | Prism, yellow                                                                                   | Prism, yellow                                                                    | Needle, yellow                                                                                  |
| T (K)                                        | 100(2)                                                                                               | 100(2)                                                                                          | 100(2)                                                                           | 100(2)                                                                                          |
| a (Å)                                        | 21.7630(9)                                                                                           | 11.824(2)                                                                                       | 27.713(4)                                                                        | 12.5375(4)                                                                                      |
| b (Å)                                        | 13.3167(5)                                                                                           | 21.450(4)                                                                                       | 19.006(3)                                                                        | 23.5583(8)                                                                                      |
| c (Å)                                        | 23.8177(10)                                                                                          | 13.054(3)                                                                                       | 33.722(4)                                                                        | 26.0114(9)                                                                                      |
| α (°)                                        | 90                                                                                                   | 90                                                                                              | 90                                                                               | 90                                                                                              |
| β (°)                                        | 93.015(2)                                                                                            | 90                                                                                              | 90                                                                               | 90                                                                                              |
| γ (°)                                        | 90                                                                                                   | 90                                                                                              | 90                                                                               | 90                                                                                              |
| Volume (Å <sup>3</sup> )                     | 6893.1(5)                                                                                            | 3310.6(12)                                                                                      | 17762(4)                                                                         | 7682.8(4)                                                                                       |
| Z                                            | 4                                                                                                    | 4                                                                                               | 16                                                                               | 8                                                                                               |
| Absorpt. coef. (mm <sup>-1</sup> )           | 5.918                                                                                                | 6.164                                                                                           | 4.447                                                                            | 4.891                                                                                           |
| Reflections collected                        | 30844                                                                                                | 65964                                                                                           | 278418                                                                           | 108840                                                                                          |
| Independent reflections                      | 30844                                                                                                | 10782 [ <i>R</i> <sub>int</sub> = 0.0380]                                                       | 18171 [ <i>R</i> <sub>int</sub> = 0.1632]                                        | 19076 [ <i>R</i> <sub>int</sub> = 0.1003]                                                       |
| Data / restraints / param.                   | 30844 / 0 / 786                                                                                      | 10782 / 1 / 424                                                                                 | 18171 / 701 / 1203                                                               | 19076 / 0 / 909                                                                                 |
| Final R indices [ <i>I</i> > 2σ( <i>I</i> )] | <i>R</i> <sub>1</sub> = 0.0855<br><i>wR</i> <sub>2</sub> = 0.1775                                    | <i>R</i> <sub>1</sub> = 0.0246<br><i>wR</i> <sub>2</sub> = 0.0482                               | <i>R</i> <sub>1</sub> = 0.0454<br><i>wR</i> <sub>2</sub> = 0.0759                | <i>R</i> <sub>1</sub> = 0.0455<br><i>wR</i> <sub>2</sub> = 0.0835                               |
| R indices (all data)                         | <i>R</i> <sub>1</sub> = 0.1550<br><i>wR</i> <sub>2</sub> = 0.2129                                    | <i>R</i> <sub>1</sub> = 0.0307<br><i>wR</i> <sub>2</sub> = 0.0504                               | <i>R</i> <sub>1</sub> = 0.0966<br><i>wR</i> <sub>2</sub> = 0.0931                | <i>R</i> <sub>1</sub> = 0.0743<br><i>wR</i> <sub>2</sub> = 0.0934                               |

**Table S2.** Main distances (Å) and angles (°) for **1W**·0.25MeOH, **1Py** and **2W**·2CH<sub>3</sub>C<sub>6</sub>H<sub>5</sub>

|                             | <b>1W</b>           |                     | <b>1Py</b> | <b>2W</b>              |                        |
|-----------------------------|---------------------|---------------------|------------|------------------------|------------------------|
|                             | <b>1W.1</b> (X = 1) | <b>1W.2</b> (X = 2) | (X = 1)    | <b>2W.1</b> (X = 1)    | <b>2W.2</b> (X = 2)    |
| DyX-OX1                     | 2.224(10)           | 2.219(12)           | 2.223(3)   | 2.201(4)               | 2.196(4)               |
| DyX-OX2                     | 2.217(11)           | 2.218(11)           | 2.166(3)   | 2.245(4)               | 2.247(4)               |
| DyX-OX3                     | 2.248(10)           | 2.237(10)           | 2.194(3)   | 2.252(4)               | 2.263(4)               |
| DyX-NX1                     | 2.559(11)           | 2.599(12)           | 2.512(4)   | 2.603(5)               | 2.601(5)               |
| DyX-NX2                     | 2.508(11)           | 2.544(13)           | 2.563(3)   | 2.537(5)               | 2.538(5)               |
| DyX-NX3                     | 2.534(11)           | 2.582(13)           | 2.531(4)   | 2.558(5)               | 2.573(5)               |
| DyX-NX4                     | 2.534(11)           | 2.524(13)           | 2.445(3)   | 2.511(5)               | 2.517(5)               |
| Dy1-N1<br>DyX-OXw           | 2.592(12)           | 2.54(2)             | 2.651(4)   | 2.460(4)               | 2.456(4)               |
| OX1-DyX-NX3                 | 145.8(4)            | 149.0(4)            | 150.80(11) | 149.91(16)             | 150.27(16)             |
| OX2-DyX-OX3                 | 149.5(4)            | 150.8(4)            | 148.65(11) | 148.96(15)             | 149.11(15)             |
| NX4-DyX-NX1                 | 147.1(4)            | 151.8(4)            | 147.99(11) | 148.97(17)             | 149.87(16)             |
| NX2-DyX-NX3/<br>OX1-DyX-OXw | 69.3(4)<br>68.2(4)  | 67.3(4)<br>85.2(6)  | 66.27(12)  | 67.79(16)<br>82.11(16) | 67.76(16)<br>81.82(17) |
| OX2-DyX-OXw                 | 71.5(5)             | 63.7(6)             |            | 67.40(15)              | 67.66(16)              |

**Table S3.** SHAPE v2.1. Continuous Shape Measures calculation (c) 2013 Electronic Structure Group, Universitat de Barcelona.**Geometries Coordination number 8**

|          |        |                                            |
|----------|--------|--------------------------------------------|
| ETBPY-8  | 13 D3h | Elongated trigonal bipyramid               |
| TT-8     | 12 Td  | Triakis tetrahedron                        |
| JSD-8    | 11 D2d | Snub diphenoid J84                         |
| BTPR-8   | 10 C2v | Biaugmented trigonal prism                 |
| JBTPR-8  | 9 C2v  | Biaugmented trigonal prism J50             |
| JETBPY-8 | 8 D3h  | Johnson elongated triangular bipyramid J14 |
| JGBF-8   | 7 D2d  | Johnson gyrobifastigium J26                |
| TDD-8    | 6 D2d  | Triangular dodecahedron                    |
| SAPR-8   | 5 D4d  | Square antiprism                           |
| CU-8     | 4 Oh   | Cube                                       |
| HBPY-8   | 3 D6h  | Hexagonal bipyramid                        |
| HPY-8    | 2 C7v  | Heptagonal pyramid                         |
| OP-8     | 1 D8h  | Octagon                                    |

[Dy(3Br,5Cl-H<sub>3</sub>L<sup>1,1,4</sup>)(H<sub>2</sub>O)]·0.25MeOH (**1W**·0.25MeOH)**1W.1**

|                 |               |               |        |         |                |          |
|-----------------|---------------|---------------|--------|---------|----------------|----------|
| Structure [ML8] | ETBPY-8       | TT-8          | JSD-8  | BTPR-8  | <b>JBTPR-8</b> | JETBPY-8 |
|                 | 24.915,       | 10.098,       | 2.568, | 2.094,  | <b>1.731,</b>  | 26.883,  |
| JGBF-8          | <b>TDD-8</b>  | <b>SAPR-8</b> | CU-8   | HBPY-8  | HPY-8          | OP-8     |
| 11.869,         | <b>1.906,</b> | <b>1.677,</b> | 9.645, | 13.967, | 22.765,        | 32.306   |

**1W.2**

|                 |               |               |         |         |                |          |
|-----------------|---------------|---------------|---------|---------|----------------|----------|
| Structure [ML8] | ETBPY-8       | TT-8          | JSD-8   | BTPR-8  | <b>JBTPR-8</b> | JETBPY-8 |
|                 | 23.956,       | 11.400,       | 2.715,  | 2.112,  | <b>1.855,</b>  | 26.310,  |
| JGBF-8          | <b>TDD-8</b>  | <b>SAPR-8</b> | CU-8    | HBPY-8  | HPY-8          | OP-8     |
| 11.691,         | <b>1.961,</b> | <b>1.914,</b> | 10.729, | 14.726, | 22.521,        | 31.063   |

[Dy(3Br,5Cl-H<sub>3</sub>L<sup>1,1,4</sup>)(Py)] (**1Py**)

|                 |               |               |        |         |                |          |
|-----------------|---------------|---------------|--------|---------|----------------|----------|
| Structure [ML8] | ETBPY-8       | TT-8          | JSD-8  | BTPR-8  | <b>JBTPR-8</b> | JETBPY-8 |
|                 | 23.785,       | 10.518,       | 2.459, | 2.290,  | <b>1.723,</b>  | 26.850,  |
| JGBF-8          | <b>TDD-8</b>  | <b>SAPR-8</b> | CU-8   | HBPY-8  | HPY-8          | OP-8     |
| 12.033,         | <b>2.156,</b> | <b>1.652,</b> | 9.954, | 14.853, | 23.528,        | 29.721   |

[Dy(3NO<sub>2</sub>,5Br-H<sub>3</sub>L<sup>1,1,4</sup>)(H<sub>2</sub>O)]·2CH<sub>3</sub>C<sub>6</sub>H<sub>5</sub> (**2W**·2CH<sub>3</sub>C<sub>6</sub>H<sub>5</sub>)

**2W.1**

|                 |               |               |         |         |                |          |
|-----------------|---------------|---------------|---------|---------|----------------|----------|
| Structure [ML8] | ETBPY-8       | TT-8          | JSD-8   | BTPR-8  | <b>JBTPR-8</b> | JETBPY-8 |
|                 | 24.200,       | 10.972,       | 2.495,  | 2.158,  | <b>1.941,</b>  | 26.212,  |
| JGBF-8          | <b>TDD-8</b>  | <b>SAPR-8</b> | CU-8    | HBPY-8  | HPY-8          | OP-8     |
| 11.959,         | <b>1.661,</b> | <b>1.738,</b> | 10.292, | 14.661, | 23.358,        | 31.544   |

**2W.2**

|                 |               |               |        |         |                |          |
|-----------------|---------------|---------------|--------|---------|----------------|----------|
| Structure [ML8] | ETBPY-8       | TT-8          | JSD-8  | BTPR-8  | <b>JBTPR-8</b> | JETBPY-8 |
|                 | 24.214,       | 10.561,       | 2.677, | 2.053,  | <b>1.870,</b>  | 26.117,  |
| JGBF-8          | <b>TDD-8</b>  | <b>SAPR-8</b> | CU-8   | HBPY-8  | HPY-8          | OP-8     |
| 12.234,         | <b>1.826,</b> | <b>1.620,</b> | 9.901, | 14.590, | 23.301,        | 31.318   |

[Y(3Br,5Cl-H<sub>3</sub>L<sup>1,1,4</sup>)(CH<sub>3</sub>OH)]·2CH<sub>3</sub>C<sub>6</sub>H<sub>5</sub> (**3M**·CH<sub>3</sub>C<sub>6</sub>H<sub>5</sub>)

**3M.1**

|                 |               |               |         |         |                |          |
|-----------------|---------------|---------------|---------|---------|----------------|----------|
| Structure [ML8] | ETBPY-8       | TT-8          | JSD-8   | BTPR-8  | <b>JBTPR-8</b> | JETBPY-8 |
|                 | 23.971,       | 12.104,       | 2.182,  | 2.241,  | 2.223,         | 26.466,  |
| JGBF-8          | <b>TDD-8</b>  | <b>SAPR-8</b> | CU-8    | HBPY-8  | HPY-8          | OP-8     |
| 11.320,         | <b>1.495,</b> | <b>2.035,</b> | 11.378, | 14.871, | 23.005,        | 31.795   |

**3M.2**

|                 |              |               |        |         |                |          |
|-----------------|--------------|---------------|--------|---------|----------------|----------|
| Structure [ML8] | ETBPY-8      | TT-8          | JSD-8  | BTPR-8  | <b>JBTPR-8</b> | JETBPY-8 |
|                 | 24.984,      | 9.980,        | 2.914, | 1.836,  | <b>1.564,</b>  | 27.483,  |
| JGBF-8          | <b>TDD-8</b> | <b>SAPR-8</b> | CU-8   | HBPY-8  | HPY-8          | OP-8     |
| 12.522,         | 2.216,       | <b>1.600,</b> | 9.418, | 14.089, | 22.591,        | 31.749   |

**Table S4.** Main distances (Å) and angles (°) for **3M**·2CH<sub>3</sub>C<sub>6</sub>H<sub>5</sub>.

| <b>3M.1</b> |            | <b>3M.2</b> |            |
|-------------|------------|-------------|------------|
| Y1-O11      | 2.165(5)   | Y2-O21      | 2.201(5)   |
| Y1-O12      | 2.245(5)   | Y2-O22      | 2.229(5)   |
| Y1-O13      | 2.205(5)   | Y2-O23      | 2.233(5)   |
| Y1-O1S      | 2.501(6)   | Y2-O2S      | 2.529(5)   |
| Y1-N11      | 2.597(6)   | Y2-N21      | 2.558(5)   |
| Y1-N12      | 2.522(6)   | Y2-N22      | 2.508(5)   |
| Y1-N13      | 2.544(6)   | Y2-N23      | 2.535(6)   |
| Y1-N14      | 2.544(6)   | Y2-N24      | 2.550(5)   |
| O13-Y1-O12  | 149.15(18) | O22-Y2-O23  | 149.24(16) |
| O12-Y1-O1S  | 64.70(19)  | O2S-Y2-N24  | 68.73(17)  |

**Table S5.** Generalised Debye model fitting parameters for **1W·0.25MeOH-2W** and **1W@Y-2W@Y**

| Compounds                                               | T/K  | $\chi_s / (\text{cm}^3 \text{mol}^{-1})$ | $\chi_T / (\text{cm}^3 \text{mol}^{-1})$ | $\tau / (10^{-4} \text{s})$ | $\alpha$ |
|---------------------------------------------------------|------|------------------------------------------|------------------------------------------|-----------------------------|----------|
| <b>1W·0.25MeOH</b><br><b>(H<sub>dc</sub> = 0 Oe)</b>    | 2.00 | 0.72                                     | 3.04                                     | 0.286                       | 0.27     |
|                                                         | 2.25 | 0.64                                     | 2.70                                     | 0.283                       | 0.27     |
|                                                         | 2.50 | 0.58                                     | 2.53                                     | 0.280                       | 0.27     |
|                                                         | 2.75 | 0.53                                     | 2.20                                     | 0.276                       | 0.27     |
|                                                         | 3.00 | 0.52                                     | 2.01                                     | 0.273                       | 0.26     |
|                                                         | 3.25 | 0.47                                     | 1.86                                     | 0.269                       | 0.27     |
|                                                         | 3.50 | 0.46                                     | 1.73                                     | 0.266                       | 0.27     |
|                                                         | 3.75 | 0.43                                     | 1.23                                     | 0.262                       | 0.27     |
|                                                         | 4.0  | 0.44                                     | 1.51                                     | 0.258                       | 0.27     |
|                                                         | 4.25 | 0.41                                     | 1.43                                     | 0.256                       | 0.27     |
|                                                         | 4.50 | 0.40                                     | 1.36                                     | 0.255                       | 0.27     |
|                                                         | 4.75 | 0.39                                     | 1.29                                     | 0.252                       | 0.27     |
| 5.00                                                    | 0.38 | 1.23                                     | 0.249                                    | 0.27                        |          |
| <b>1Py</b><br><b>(H<sub>dc</sub> = 0 Oe)</b>            | 2    | 0.32                                     | 6.19                                     | 11.56                       | 0.38     |
|                                                         | 2.5  | 0.27                                     | 4.97                                     | 10.64                       | 0.38     |
|                                                         | 3    | 0.24                                     | 4.15                                     | 10.61                       | 0.37     |
|                                                         | 3.5  | 0.22                                     | 3.55                                     | 9.68                        | 0.37     |
|                                                         | 4    | 0.20                                     | 3.09                                     | 9.30                        | 0.36     |
|                                                         | 4.5  | 0.19                                     | 2.74                                     | 8.25                        | 0.36     |
|                                                         | 5    | 0.18                                     | 2.45                                     | 7.67                        | 0.35     |
|                                                         | 5.5  | 0.17                                     | 2.22                                     | 6.84                        | 0.34     |
|                                                         | 6    | 0.16                                     | 2.02                                     | 6.43                        | 0.33     |
|                                                         | 6.5  | 0.16                                     | 1.86                                     | 6.03                        | 0.33     |
|                                                         | 7    | 0.15                                     | 1.71                                     | 5.66                        | 0.32     |
|                                                         | 8    | 0.15                                     | 1.48                                     | 5.00                        | 0.30     |
|                                                         | 8.5  | 0.14                                     | 1.39                                     | 4.72                        | 0.29     |
|                                                         | 9    | 0.14                                     | 1.31                                     | 4.43                        | 0.28     |
|                                                         | 9.5  | 0.14                                     | 1.23                                     | 4.18                        | 0.27     |
|                                                         | 10   | 0.13                                     | 1.17                                     | 3.94                        | 0.23     |
|                                                         | 10.5 | 0.13                                     | 1.11                                     | 3.70                        | 0.25     |
|                                                         | 11   | 0.13                                     | 1.06                                     | 3.50                        | 0.24     |
|                                                         | 11.5 | 0.13                                     | 1.01                                     | 3.30                        | 0.23     |
|                                                         | 12   | 0.13                                     | 0.96                                     | 3.10                        | 0.22     |
| 12.5                                                    | 0.13 | 0.92                                     | 2.93                                     | 0.21                        |          |
| 13                                                      | 0.12 | 0.88                                     | 2.77                                     | 0.20                        |          |
| 13.5                                                    | 0.12 | 0.85                                     | 2.61                                     | 0.19                        |          |
| 14                                                      | 0.12 | 0.82                                     | 2.46                                     | 0.18                        |          |
| 14.5                                                    | 0.12 | 0.79                                     | 2.33                                     | 0.17                        |          |
| 15                                                      | 0.12 | 0.76                                     | 2.20                                     | 0.16                        |          |
| <b>1W·0.25MeOH</b><br><b>(H<sub>dc</sub> = 1000 Oe)</b> | 8    | 0.95                                     | 1.15                                     | 9.94                        | 0.58     |
|                                                         | 8.5  | 0.88                                     | 1.15                                     | 7.76                        | 0.57     |
|                                                         | 9    | 0.81                                     | 1.16                                     | 5.94                        | 0.55     |
|                                                         | 9.5  | 0.75                                     | 1.16                                     | 4.83                        | 0.53     |
|                                                         | 10   | 0.70                                     | 1.16                                     | 4.16                        | 0.52     |
|                                                         | 10.5 | 0.65                                     | 1.17                                     | 3.38                        | 0.50     |
|                                                         | 11   | 0.62                                     | 1.17                                     | 2.80                        | 0.49     |
|                                                         | 11.5 | 0.59                                     | 1.17                                     | 2.36                        | 0.48     |
|                                                         | 12   | 0.56                                     | 1.17                                     | 2.00                        | 0.47     |
|                                                         | 12.5 | 0.54                                     | 1.17                                     | 1.70                        | 0.46     |
|                                                         | 13   | 0.51                                     | 1.17                                     | 1.43                        | 0.45     |
|                                                         | 13.5 | 0.49                                     | 1.17                                     | 1.22                        | 0.43     |



|                                                 |       |      |      |       |      |
|-------------------------------------------------|-------|------|------|-------|------|
|                                                 | 14    | 0.47 | 1.17 | 1.02  | 0.42 |
|                                                 | 14.5  | 0.45 | 1.17 | 0.87  | 0.41 |
|                                                 | 15    | 0.43 | 1.17 | 0.72  | 0.41 |
|                                                 | 15.5  | 0.42 | 1.17 | 0.61  | 0.40 |
|                                                 | 16    | 0.40 | 1.17 | 0.49  | 0.41 |
|                                                 | 16.5  | 0.39 | 1.17 | 0.405 | 0.41 |
|                                                 | 17    | 0.38 | 1.16 | 0.33  | 0.42 |
|                                                 | 17.5  | 0.37 | 1.16 | 0.28  | 0.42 |
| <b>1Py</b><br><b>(H<sub>dc</sub> = 1000 Oe)</b> | 14    | 0.34 | 2.69 | 15.19 | 0.15 |
|                                                 | 14.25 | 0.28 | 2.79 | 14.02 | 0.21 |
|                                                 | 14.5  | 0.32 | 2.58 | 12.86 | 0.15 |
|                                                 | 14.75 | 0.28 | 2.63 | 11.99 | 0.20 |
|                                                 | 15    | 0.32 | 2.46 | 11.11 | 0.14 |
|                                                 | 15.25 | 0.28 | 2.50 | 10.36 | 0.19 |
|                                                 | 15.5  | 0.31 | 2.36 | 9.67  | 0.14 |
|                                                 | 15.75 | 0.28 | 2.38 | 9.07  | 0.17 |
|                                                 | 16    | 0.31 | 2.27 | 8.51  | 0.13 |
|                                                 | 16.25 | 0.27 | 2.27 | 7.97  | 0.16 |
|                                                 | 16.5  | 0.31 | 2.18 | 7.50  | 0.13 |
|                                                 | 16.75 | 0.27 | 2.18 | 7.07  | 0.16 |
|                                                 | 17    | 0.30 | 2.08 | 6.62  | 0.11 |
|                                                 | 17.25 | 0.27 | 2.09 | 6.26  | 0.15 |
|                                                 | 17.5  | 0.30 | 2.02 | 5.90  | 0.10 |
|                                                 | 17.75 | 0.27 | 2.01 | 5.56  | 0.14 |
|                                                 | 18    | 0.30 | 1.96 | 5.23  | 0.10 |
|                                                 | 18.25 | 0.27 | 1.96 | 4.93  | 0.13 |
|                                                 | 18.5  | 0.27 | 1.92 | 4.65  | 0.12 |
|                                                 | 18.75 | 0.27 | 1.90 | 4.39  | 0.12 |
|                                                 | 19    | 0.27 | 1.86 | 4.14  | 0.12 |
|                                                 | 19.25 | 0.27 | 1.83 | 3.89  | 0.11 |
|                                                 | 19.5  | 0.26 | 1.81 | 3.67  | 0.11 |
|                                                 | 19.75 | 0.26 | 1.77 | 3.45  | 0.11 |
|                                                 | 20    | 0.26 | 1.75 | 3.24  | 0.11 |
|                                                 | 20.25 | 0.26 | 1.73 | 3.06  | 0.11 |
|                                                 | 20.5  | 0.26 | 1.69 | 2.86  | 0.10 |
|                                                 | 20.75 | 0.26 | 1.67 | 2.69  | 0.10 |
|                                                 | 21    | 0.26 | 1.65 | 2.51  | 0.10 |
|                                                 | 21.25 | 0.26 | 1.62 | 2.35  | 0.10 |
|                                                 | 21.5  | 0.26 | 1.61 | 2.19  | 0.10 |
|                                                 | 21.75 | 0.26 | 1.58 | 2.04  | 0.09 |
| 22                                              | 0.25  | 1.56 | 1.89 | 0.09  |      |
| 22.5                                            | 0.25  | 1.53 | 1.63 | 0.09  |      |
| 23                                              | 0.25  | 1.49 | 1.39 | 0.09  |      |
| 23.5                                            | 0.25  | 1.45 | 1.18 | 0.08  |      |
| 24                                              | 0.25  | 1.43 | 0.99 | 0.09  |      |
| 24.5                                            | 0.25  | 1.40 | 0.83 | 0.10  |      |
| 25                                              | 0.24  | 1.37 | 0.69 | 0.10  |      |
| 25.5                                            | 0.25  | 1.34 | 0.60 | 0.09  |      |
| 26                                              | 0.25  | 1.31 | 0.47 | 0.08  |      |
| 26.5                                            | 0.24  | 1.29 | 0.39 | 0.09  |      |
| 27                                              | 0.25  | 1.27 | 0.32 | 0.08  |      |
| 27.5                                            | 0.23  | 1.25 | 0.26 | 0.09  |      |
| 28                                              | 0.23  | 1.22 | 0.22 | 0.09  |      |
| 28.5                                            | 0.23  | 1.53 | 0.18 | 0.09  |      |

|                                    |      |      |      |       |      |
|------------------------------------|------|------|------|-------|------|
| <b>2W</b><br>( $H_{dc} = 1000$ Oe) | 4    | 0.25 | 3.19 | 26.18 | 0.62 |
|                                    | 4.5  | 0.26 | 2.84 | 20.68 | 0.61 |
|                                    | 5    | 0.27 | 2.48 | 14.28 | 0.60 |
|                                    | 5.5  | 0.29 | 2.23 | 10.66 | 0.59 |
|                                    | 6    | 0.30 | 2.02 | 8.07  | 0.58 |
|                                    | 6.5  | 0.31 | 1.81 | 5.81  | 0.57 |
|                                    | 7    | 0.31 | 1.69 | 4.79  | 0.57 |
|                                    | 7.5  | 0.32 | 1.56 | 3.78  | 0.56 |
|                                    | 8    | 0.33 | 1.45 | 3.02  | 0.56 |
|                                    | 8.5  | 0.34 | 1.35 | 2.47  | 0.54 |
|                                    | 9    | 0.34 | 1.27 | 2.02  | 0.54 |
|                                    | 9.5  | 0.35 | 1.19 | 1.67  | 0.53 |
|                                    | 10   | 0.36 | 1.11 | 1.40  | 0.52 |
|                                    | 10.5 | 0.36 | 1.06 | 1.19  | 0.51 |
|                                    | 11   | 0.36 | 1.07 | 1.01  | 0.51 |
|                                    | 11.5 | 0.36 | 0.97 | 0.86  | 0.51 |
|                                    | 12   | 0.36 | 0.92 | 0.74  | 0.50 |
|                                    | 12.5 | 0.37 | 0.88 | 0.66  | 0.49 |
|                                    | 13   | 0.38 | 0.85 | 0.58  | 0.48 |
|                                    | 13.5 | 0.38 | 0.82 | 0.51  | 0.48 |
| 14                                 | 0.38 | 0.79 | 0.45 | 0.47  |      |
| 14.5                               | 0.37 | 0.76 | 0.40 | 0.48  |      |
| 15                                 | 0.38 | 0.73 | 0.36 | 0.46  |      |
| 15.5                               | 0.38 | 0.71 | 0.32 | 0.45  |      |
| 16                                 | 0.39 | 0.68 | 0.30 | 0.44  |      |
| 16.5                               | 0.39 | 0.66 | 0.27 | 0.42  |      |
| <b>1W@Y</b><br>( $H_{dc} = 0$ Oe)  | 2    | 0.02 | 0.65 | 3.97  | 0.54 |
|                                    | 2.5  | 0.02 | 0.53 | 3.61  | 0.55 |
|                                    | 3    | 0.02 | 0.46 | 3.15  | 0.55 |
|                                    | 3.5  | 0.02 | 0.40 | 2.84  | 0.56 |
|                                    | 4    | 0.02 | 0.35 | 2.59  | 0.55 |
|                                    | 4.5  | 0.02 | 0.32 | 2.32  | 0.55 |
|                                    | 5    | 0.03 | 0.29 | 2.09  | 0.55 |
|                                    | 5.5  | 0.03 | 0.26 | 1.89  | 0.55 |
|                                    | 6    | 0.03 | 0.24 | 1.72  | 0.55 |
|                                    | 6.5  | 0.03 | 0.22 | 1.55  | 0.54 |
|                                    | 7    | 0.03 | 0.21 | 1.38  | 0.54 |
|                                    | 7.5  | 0.03 | 0.20 | 1.27  | 0.53 |
|                                    | 8    | 0.03 | 0.19 | 1.21  | 0.53 |
|                                    | 8.5  | 0.03 | 0.17 | 1.10  | 0.52 |
|                                    | 9    | 0.03 | 0.16 | 1.04  | 0.50 |
|                                    | 9.5  | 0.03 | 0.16 | 0.99  | 0.50 |
|                                    | 10   | 0.04 | 0.15 | 0.90  | 0.49 |
|                                    | 10.5 | 0.04 | 0.14 | 0.86  | 0.49 |
|                                    | 11   | 0.04 | 0.14 | 0.78  | 0.49 |
|                                    | 11.5 | 0.04 | 0.13 | 0.75  | 0.47 |
| 12.0                               | 0.04 | 0.13 | 0.70 | 0.49  |      |
| 12.5                               | 0.04 | 0.12 | 0.64 | 0.46  |      |
| 13                                 | 0.04 | 0.12 | 0.60 | 0.47  |      |
| 13.5                               | 0.04 | 0.11 | 0.56 | 0.47  |      |
| 14                                 | 0.04 | 0.11 | 0.51 | 0.48  |      |
| 14.5                               | 0.04 | 0.10 | 0.46 | 0.46  |      |
| 15                                 | 0.04 | 0.09 | 0.42 | 0.48  |      |

|                                    |      |      |      |      |      |
|------------------------------------|------|------|------|------|------|
|                                    | 15.5 | 0.04 | 0.09 | 0.39 | 0.47 |
|                                    | 16   | 0.04 | 0.09 | 0.36 | 0.47 |
|                                    | 16.5 | 0.04 | 0.09 | 0.34 | 0.45 |
| <b>1Py@Y</b><br>( $H_{dc} = 0$ Oe) | 3    | 0.02 | 0.58 | 1.37 | 0.54 |
|                                    | 3.5  | 0.02 | 0.50 | 1.05 | 0.54 |
|                                    | 4    | 0.02 | 0.45 | 0.92 | 0.56 |
|                                    | 4.5  | 0.02 | 0.40 | 0.84 | 0.56 |
|                                    | 5    | 0.03 | 0.34 | 0.75 | 0.52 |
|                                    | 5.5  | 0.03 | 0.32 | 0.67 | 0.53 |
|                                    | 6    | 0.05 | 0.27 | 0.60 | 0.46 |
|                                    | 6.5  | 0.05 | 0.22 | 0.54 | 0.49 |
|                                    | 7    | 0.04 | 0.25 | 0.51 | 0.50 |
|                                    | 7.5  | 0.03 | 0.22 | 0.48 | 0.54 |
|                                    | 8    | 0.03 | 0.23 | 0.46 | 0.53 |
|                                    | 8.5  | 0.02 | 0.23 | 0.43 | 0.58 |
|                                    | 9    | 0.04 | 0.20 | 0.40 | 0.49 |
|                                    | 9.5  | 0.05 | 0.18 | 0.39 | 0.43 |
|                                    | 10   | 0.04 | 0.19 | 0.37 | 0.54 |
|                                    | 10.5 | 0.05 | 0.16 | 0.35 | 0.43 |
| 11                                 | 0.04 | 0.16 | 0.34 | 0.48 |      |
| 11.5                               | 0.05 | 0.16 | 0.33 | 0.42 |      |
| <b>2W@Y</b><br>( $H_{dc} = 0$ Oe)  | 3.5  | 0.02 | 0.29 | 2.80 | 0.56 |
|                                    | 4    | 0.03 | 0.25 | 2.58 | 0.54 |
|                                    | 4.5  | 0.02 | 0.24 | 2.32 | 0.58 |
|                                    | 5    | 0.02 | 0.21 | 1.90 | 0.56 |
|                                    | 5.5  | 0.03 | 0.19 | 1.62 | 0.53 |
|                                    | 6    | 0.03 | 0.18 | 1.41 | 0.54 |
|                                    | 6.5  | 0.03 | 0.18 | 1.27 | 0.55 |
|                                    | 7    | 0.03 | 0.16 | 1.14 | 0.53 |
|                                    | 8    | 0.03 | 0.19 | 0.93 | 0.53 |
|                                    | 8.5  | 0.03 | 0.17 | 0.83 | 0.53 |
|                                    | 9    | 0.03 | 0.16 | 0.75 | 0.50 |
|                                    | 9.5  | 0.03 | 0.16 | 0.70 | 0.50 |
|                                    | 10   | 0.03 | 0.15 | 0.65 | 0.50 |
|                                    | 10.5 | 0.04 | 0.14 | 0.62 | 0.49 |
|                                    | 11.5 | 0.04 | 0.13 | 0.56 | 0.47 |
| 12.0                               | 0.04 | 0.12 | 0.54 | 0.47 |      |

**Table S6.** Electronic structure of **1W** complexes calculated with the crystal field parameters obtained from CASSCF-SO at the crystal structure. Each row corresponds to a Kramers doublet. Last column reports the CASSCF-SO energies.

| Energy (cm <sup>-1</sup> ) | Energy (K) | g1   | g2   | g3    | Angle | Wavefunction                                                                                                           | <Jz>  | Energy <sup>CAS</sup> (cm <sup>-1</sup> ) |
|----------------------------|------------|------|------|-------|-------|------------------------------------------------------------------------------------------------------------------------|-------|-------------------------------------------|
| <b>1W.1</b>                |            |      |      |       |       |                                                                                                                        |       |                                           |
| 0.00                       | 0.00       | 0.00 | 0.00 | 19.80 | --    | 99% ± 15/2>                                                                                                            | ± 7.5 | 0.00                                      |
| 202.30                     | 291.06     | 0.71 | 1.62 | 16.83 | 47.1  | 46% ± 13/2> +<br>12% ± 11/2> +<br>9% ± 7/2> +<br>9% ± 3/2> +<br>5% ± 9/2> +<br>5% ± 5/2> +<br>5% ± 1/2> +<br>5% ∓ 1/2> | ± 4.4 | 202.42                                    |
| 264.15                     | 380.05     | 0.18 | 1.81 | 13.21 | 40.7  | 47% ± 13/2> +<br>10% ± 5/2> +<br>8% ∓ 1/2> +<br>9% ± 1/2> +<br>8% ± 3/2> +<br>7% ± 9/2>                                | ± 3.7 | 261.71                                    |
| 399.85                     | 575.29     | 2.65 | 4.95 | 11.16 | 45.8  | 48% ± 11/2> +<br>13% ± 9/2> +<br>10% ∓ 3/2> +<br>7% ∓ 1/2> +<br>6% ± 3/2> +<br>5% ± 1/2>                               | ± 3.2 | 396.76                                    |
| 492.64                     | 708.79     | 0.28 | 6.65 | 8.44  | 79.1  | 22% ± 11/2> +<br>19% ± 7/2> +<br>17% ∓ 5/2> +<br>11% ∓ 1/2> +<br>8% ∓ 3/2> +<br>6% ∓ 9/2>                              | ± 1.2 | 489.54                                    |
| 558.17                     | 803.07     | 2.39 | 3.57 | 10.60 | 68.5  | 38% ± 9/2> +<br>11% ∓ 7/2> +<br>15% ∓ 5/2> +<br>11% ± 11/2>                                                            | ± 1.8 | 558.62                                    |
| 620.26                     | 892.41     | 0.96 | 2.26 | 15.53 | 81.5  | 22% ± 7/2> +<br>18% ± 9/2> +<br>14% ∓ 1/2> +<br>14% ∓ 3/2> +<br>13% ∓ 5/2> +<br>8% ± 1/2>                              | ± 1.1 | 619.68                                    |

|             |         |      |      |       |      |             |   |       |        |
|-------------|---------|------|------|-------|------|-------------|---|-------|--------|
|             |         |      |      |       |      | 24% ± 3/2)  | + |       |        |
|             |         |      |      |       |      | 26% ± 5/2)  | + |       |        |
| 748.16      | 1076.43 | 0.05 | 0.12 | 19.46 | 74.8 | 18% ± 7/2)  | + | ± 1.9 | 748.14 |
|             |         |      |      |       |      | 16% ± 1/2)  | + |       |        |
|             |         |      |      |       |      | 7% ∓ 1/2)   |   |       |        |
| <b>1W.2</b> |         |      |      |       |      |             |   |       |        |
| 0.00        | 0.00    | 0.01 | 0.02 | 19.81 | --   | 99% ± 15/2) |   | ± 7.5 | 0.00   |
|             |         |      |      |       |      | 29% ± 13/2) | + |       |        |
|             |         |      |      |       |      | 12% ± 7/2)  | + |       |        |
| 187.72      | 270.09  | 0.89 | 1.84 | 17.54 | 59.3 | 13% ± 3/2)  | + | ± 3.5 | 186.84 |
|             |         |      |      |       |      | 9% ± 5/2)   | + |       |        |
|             |         |      |      |       |      | 10% ± 11/2) |   |       |        |
|             |         |      |      |       |      | 63% ± 13/2) | + |       |        |
|             |         |      |      |       |      | 8% ± 5/2)   | + |       |        |
| 251.38      | 361.68  | 0.21 | 2.51 | 13.19 | 26.7 | 6% ± 3/2)   | + | ± 4.4 | 249.83 |
|             |         |      |      |       |      | 6% ± 1/2)   | + |       |        |
|             |         |      |      |       |      | 6% ∓ 1/2)   |   |       |        |
|             |         |      |      |       |      | 45% ± 11/2) | + |       |        |
|             |         |      |      |       |      | 14% ± 9/2)  | + |       |        |
| 376.64      | 541.90  | 3.11 | 5.93 | 10.62 | 45.5 | 9% ∓ 3/2)   | + | ± 3.1 | 373.85 |
|             |         |      |      |       |      | 7% ± 1/2)   | + |       |        |
|             |         |      |      |       |      | 5% ± 3/2)   | + |       |        |
|             |         |      |      |       |      | 1% ∓ 1/2)   |   |       |        |
|             |         |      |      |       |      | 25% ± 11/2) | + |       |        |
|             |         |      |      |       |      | 18% ± 7/2)  | + |       |        |
| 475.09      | 683.54  | 0.50 | 6.31 | 9.92  | 79.5 | 12% ∓ 1/2)  | + | ± 1.7 | 471.67 |
|             |         |      |      |       |      | 11% ∓ 3/2)  | + |       |        |
|             |         |      |      |       |      | 11% ± 5/2)  |   |       |        |
|             |         |      |      |       |      | 30% ± 9/2)  | + |       |        |
|             |         |      |      |       |      | 13% ± 11/2) | + |       |        |
| 552.06      | 794.28  | 2.54 | 4.18 | 9.60  | 69.0 | 12% ± 3/2)  | + | ± 1.9 | 550.96 |
|             |         |      |      |       |      | 11% ± 1/2)  | + |       |        |
|             |         |      |      |       |      | 12% ∓ 5/2)  | + |       |        |
|             |         |      |      |       |      | 7% ∓ 3/2)   |   |       |        |
|             |         |      |      |       |      | 31% ± 7/2)  | + |       |        |
|             |         |      |      |       |      | 19% ± 9/2)  | + |       |        |
| 587.37      | 845.09  | 1.90 | 6.92 | 12.66 | 75.6 | 10% ∓ 5/2)  | + | ± 1.8 | 588.40 |
|             |         |      |      |       |      | 8% ± 5/2)   | + |       |        |
|             |         |      |      |       |      | 10% ± 1/2)  |   |       |        |
|             |         |      |      |       |      | 24% ± 3/2)  | + |       |        |
|             |         |      |      |       |      | 20% ± 5/2)  | + |       |        |
| 716.55      | 1030.95 | 0.05 | 0.12 | 19.62 | 75.4 | 19% ± 1/2)  | + | ± 1.9 | 716.03 |
|             |         |      |      |       |      | 12% ∓ 1/2)  | + |       |        |
|             |         |      |      |       |      | 6% ∓ 3/2)   | + |       |        |
|             |         |      |      |       |      | 10% ± 7/2)  |   |       |        |

**Table S7.** Electronic structure of **1W** complex calculated with the crystal field parameters obtained from CASSCF-SO at the DFT-optimised structure. Each row corresponds to a Kramers doublet. Last column reports the CASSCF-SO energies.

| Energy (cm <sup>-1</sup> ) | Energy (K) | g1   | g2   | g3    | Angle | Wavefunction  | <Jz> | Energy <sup>CAS</sup> (cm <sup>-1</sup> ) |
|----------------------------|------------|------|------|-------|-------|---------------|------|-------------------------------------------|
| 0.00                       | 0.00       | 0.03 | 0.05 | 19.72 | --    | 99% ± 15/2>   | 7.4  | 0.00                                      |
|                            |            |      |      |       |       | 8% ∓ 3/2> +   |      |                                           |
|                            |            |      |      |       |       | 4% ± 11/2> +  |      |                                           |
|                            |            |      |      |       |       | 9% ± 7/2> +   |      |                                           |
| 106.54                     | 153.28     | 0.45 | 0.57 | 19.23 | 81.5  | 18% ± 3/2> +  | 1.1  | 106.46                                    |
|                            |            |      |      |       |       | 5% ± 9/2> +   |      |                                           |
|                            |            |      |      |       |       | 10% ± 5/2> +  |      |                                           |
|                            |            |      |      |       |       | 14% ± 1/2> +  |      |                                           |
|                            |            |      |      |       |       | 19% ∓ 1/2>    |      |                                           |
| 213.06                     | 306.54     | 1.64 | 2.26 | 14.83 | 8.2   | 86% ± 13/2> + | 5.6  | 212.69                                    |
|                            |            |      |      |       |       | 4% ∓ 1/2>     |      |                                           |
|                            |            |      |      |       |       | 27% ± 11/2> + |      |                                           |
|                            |            |      |      |       |       | 14% ± 9/2> +  |      |                                           |
| 318.82                     | 458.70     | 1.99 | 5.40 | 11.06 | 71.4  | 16% ∓ 3/2> +  | 1.7  | 315.62                                    |
|                            |            |      |      |       |       | 8% ∓ 5/2> +   |      |                                           |
|                            |            |      |      |       |       | 7% ∓ 3/2> +   |      |                                           |
|                            |            |      |      |       |       | 8% ± 5/2>     |      |                                           |
|                            |            |      |      |       |       | 49% ± 11/2> + |      |                                           |
|                            |            |      |      |       |       | 14% ± 5/2> +  |      |                                           |
| 397.25                     | 571.55     | 0.54 | 7.06 | 8.53  | 51.3  | 9% ∓ 7/2> +   | 2.8  | 397.08                                    |
|                            |            |      |      |       |       | 7% ± 3/2> +   |      |                                           |
|                            |            |      |      |       |       | 7% ∓ 3/2>     |      |                                           |
|                            |            |      |      |       |       | 38% ± 9/2> +  |      |                                           |
|                            |            |      |      |       |       | 17% ± 7/2> +  |      |                                           |
| 442.20                     | 636.22     | 2.72 | 6.00 | 10.63 | 66.2  | 12% ∓ 7/2> +  | 1.9  | 441.42                                    |
|                            |            |      |      |       |       | 8% ∓ 1/2>     |      |                                           |
|                            |            |      |      |       |       | 22% ± 3/2> +  |      |                                           |
|                            |            |      |      |       |       | 14% ± 9/2> +  |      |                                           |
| 478.70                     | 688.74     | 1.40 | 2.25 | 16.85 | 84.2  | 25% ∓ 1/2> +  | 0.8  | 478.12                                    |
|                            |            |      |      |       |       | 14% ∓ 3/2> +  |      |                                           |
|                            |            |      |      |       |       | 9% ∓ 7/2> +   |      |                                           |
|                            |            |      |      |       |       | 12% ± 5/2>    |      |                                           |
|                            |            |      |      |       |       | 20% ± 3/2> +  |      |                                           |
|                            |            |      |      |       |       | 27% ± 5/2> +  |      |                                           |
| 625.07                     | 899.33     | 0.05 | 0.07 | 19.52 | 69.6  | 24% ± 7/2> +  | 2.5  | 625.82                                    |
|                            |            |      |      |       |       | 13% ± 9/2> +  |      |                                           |
|                            |            |      |      |       |       | 9% ± 1/2>     |      |                                           |

**Table S8.** Electronic structure of **1Py** complex calculated with the crystal field parameters obtained from CASSCF-SO at the crystal structure. Each row corresponds to a Kramers doublet. Last column reports the CASSCF-SO energies.

| Energy (cm <sup>-1</sup> ) | Energy (K) | g1   | g2   | g3    | Angle | Wavefunction                                                                                             | <Jz> | Energy <sup>CAS</sup> (cm <sup>-1</sup> ) |
|----------------------------|------------|------|------|-------|-------|----------------------------------------------------------------------------------------------------------|------|-------------------------------------------|
| 0.00                       | 0.00       | 0.01 | 0.01 | 19.80 | --    | 99% ± 15/2⟩                                                                                              | ±7.5 | 0.00                                      |
| 224.80                     | 323.43     | 0.29 | 0.41 | 16.98 | 15.7  | 87% ± 13/2⟩ +<br>8% ± 11/2⟩                                                                              | ±6.2 | 226.04                                    |
| 342.89                     | 493.34     | 1.05 | 1.39 | 15.39 | 53.6  | 24% ± 9/2⟩ +<br>21% ± 11/2⟩ +<br>11% ± 5/2⟩ +<br>9% ± 1/2⟩ +<br>9% ± 7/2⟩                                | ±3.4 | 339.23                                    |
| 437.51                     | 629.48     | 1.46 | 4.16 | 11.22 | 39.3  | 46% ± 11/2⟩ +<br>13% ± 7/2⟩ +<br>10% ± 5/2⟩ +<br>9% ± 3/2⟩ +<br>5% ± 1/2⟩                                | ±3.4 | 435.75                                    |
| 508.90                     | 732.19     | 2.83 | 6.01 | 12.87 | 76.5  | 22% ± 3/2⟩ +<br>16% ± 7/2⟩ +<br>15% ± 9/2⟩ +<br>13% ± 5/2⟩ +<br>7% ± 1/2⟩ +<br>9% ± 1/2⟩ +<br>6% ± 11/2⟩ | ±1.9 | 507.41                                    |
| 576.68                     | 829.71     | 0.94 | 2.05 | 13.58 | 80.1  | 30% ± 1/2⟩ +<br>16% ± 1/2⟩ +<br>11% ± 9/2⟩ +<br>11% ± 5/2⟩ +<br>9% ± 3/2⟩ +<br>6% ± 7/2⟩                 | ±1.0 | 574.12                                    |
| 647.30                     | 931.32     | 0.02 | 0.48 | 15.69 | 69.8  | 32% ± 3/2⟩ +<br>20% ± 5/2⟩ +<br>17% ± 9/2⟩ +<br>10% ± 1/2⟩ +<br>9% ± 7/2⟩                                | ±2.1 | 646.89                                    |
| 724.61                     | 1042.54    | 0.15 | 0.59 | 18.33 | 59.5  | 38% ± 7/2⟩ +<br>23% ± 9/2⟩ +<br>21% ± 5/2⟩ +<br>9% ± 11/2⟩                                               | ±3.5 | 726.59                                    |

**Table S9.** Electronic structure of **1Py** complex calculated with the crystal field parameters obtained from CASSCF-SO at the DFT-optimised structure. Each row corresponds to a Kramers doublet. Last column reports the CASSCF-SO energies.

| Energy (cm <sup>-1</sup> ) | Energy (K) | g1   | g2   | g3    | Angle | Wavefunction                                                                                | <Jz>  | Energy <sup>CAS</sup> (cm <sup>-1</sup> ) |
|----------------------------|------------|------|------|-------|-------|---------------------------------------------------------------------------------------------|-------|-------------------------------------------|
| 0.00                       | 0.00       | 0.02 | 0.03 | 19.79 | --    | 99% ± 15/2>                                                                                 | ± 7.5 | 0.00                                      |
| 145.75                     | 209.70     | 0.61 | 1.02 | 17.82 | 54.1  | 32% ± 13/2> +<br>13% ± 11/2> +<br>10% ± 9/2> +<br>13% ± 7/2> +<br>9% ± 5/2> +<br>10% ± 3/2> | ± 4.0 | 145.73                                    |
| 225.92                     | 325.05     | 1.04 | 2.18 | 13.26 | 27.6  | 60% ± 13/2><br>9% ± 5/2> +<br>6% ± 1/2> +<br>6% ± 3/2>                                      | ± 4.4 | 225.51                                    |
| 342.00                     | 492.06     | 2.96 | 5.61 | 10.18 | 42.5  | 48% ± 11/2> +<br>8% ± 9/2> +<br>6% ± 3/2><br>8% ∓ 3/2> +<br>8% ± 1/2>                       | ± 3.0 | 340.20                                    |
| 438.66                     | 631.13     | 0.89 | 6.30 | 9.35  | 79.0  | 22% ± 11/2> +<br>15% ± 7/2> +<br>13% ± 9/2> +<br>11% ∓ 3/2> +<br>11% ∓ 1/2> +<br>10% ± 5/2> | ± 1.9 | 437.37                                    |
| 504.83                     | 726.33     | 0.20 | 3.96 | 11.02 | 77.9  | 26% ± 9/2> +<br>16% ± 3/2> +<br>15% ± 1/2> +<br>9% ∓ 1/2> +<br>8% ∓ 3/2> +<br>8% ∓ 5/2>     | ± 1.3 | 504.72                                    |
| 539.11                     | 775.66     | 1.26 | 3.83 | 15.32 | 61.6  | 35% ± 7/2> +<br>20% ± 5/2> +<br>19% ± 9/2> +<br>5% ± 1/2> +<br>5% ± 3/2>                    | ± 2.7 | 540.11                                    |
| 612.67                     | 881.48     | 0.08 | 0.16 | 19.56 | 74.7  | 24% ± 5/2> +<br>22% ± 3/2> +<br>19% ± 7/2> +<br>8% ± 9/2>                                   | ± 1.9 | 612.70                                    |



**Table S10.** Electronic structure of **2W** complexes calculated with the crystal field parameters obtained from CASSCF-SO at the crystal structure. Each row corresponds to a Kramers doublet. Last column reports the CASSCF-SO energies.

| Energy (cm <sup>-1</sup> ) | Energy (K) | g1   | g2   | g3    | Angle | Wavefunction                                                                                               | <Jz>  | Energy <sup>CAS</sup> (cm <sup>-1</sup> ) |
|----------------------------|------------|------|------|-------|-------|------------------------------------------------------------------------------------------------------------|-------|-------------------------------------------|
| <b>2W.1</b>                |            |      |      |       |       |                                                                                                            |       |                                           |
| 0.00                       | 0.00       | 0.02 | 0.03 | 19.68 | --    | 97% ± 15/2> +<br>3% ± 11/2>                                                                                | ± 7.4 | 0.00                                      |
| 82.42                      | 118.59     | 0.20 | 0.24 | 19.52 | 79.6  | 18% ± 3/2> +<br>16% ∓ 1/2> +<br>17% ± 1/2> +<br>13% ± 5/2> +<br>8% ∓ 3/2> +<br>10% ± 7/2> +<br>6% ± 9/2> + | ± 1.3 | 82.12                                     |
| 180.99                     | 260.40     | 1.27 | 2.00 | 15.40 | 9.1   | 83% ± 13/2> +<br>5% ± 11/2> +<br>2% ± 9/2> +<br>2% ± 5/2>                                                  | ± 5.8 | 180.46                                    |
| 256.19                     | 368.59     | 3.28 | 6.03 | 11.33 | 73.1  | 26% ± 11/2> +<br>19% ± 9/2> +<br>16% ∓ 3/2> +<br>10% ± 5/2>                                                | ± 1.9 | 255.60                                    |
| 330.45                     | 475.44     | 0.55 | 4.99 | 11.87 | 77.2  | 28% ± 11/2> +<br>17% ± 7/2> +<br>11% ∓ 7/2> +<br>9% ± 9/2> +<br>8% ∓ 5/2> +<br>5% ∓ 9/2> +<br>5% ± 1/2>    | ± 1.7 | 329.38                                    |
| 383.06                     | 551.13     | 0.64 | 2.16 | 14.99 | 84.2  | 18% ± 1/2> +<br>16% ± 7/2> +<br>15% ± 3/2> +<br>14% ∓ 5/2> +<br>9% ± 5/2> +<br>9% ± 9/2>                   | ± 0.8 | 381.91                                    |
| 434.97                     | 625.82     | 0.22 | 1.16 | 16.62 | 52.8  | 37% ± 9/2> +<br>21% ± 11/2> +<br>13% ± 7/2> +<br>7% ∓ 1/2> +<br>6% ± 13/2>                                 | ± 3.8 | 434.91                                    |
| 492.62                     | 708.77     | 0.25 | 0.63 | 18.92 | 74.1  | 25% ± 5/2> +<br>23% ± 3/2> +                                                                               | ± 1.9 | 493.13                                    |

|        |        |      |      |       |      |                                                                                                             | 21% ± 7/2) + |        |  |
|--------|--------|------|------|-------|------|-------------------------------------------------------------------------------------------------------------|--------------|--------|--|
|        |        |      |      |       |      |                                                                                                             | 13% ± 1/2) + |        |  |
|        |        |      |      |       |      |                                                                                                             | 7% ± 9/2)    |        |  |
|        |        |      |      |       |      |                                                                                                             | <b>2W.2</b>  |        |  |
| 0.00   | 0.00   | 0.00 | 0.00 | 19.74 | --   | 98% ± 15/2) +<br>2% ± 11/2)                                                                                 | 7.2          | 0.00   |  |
| 168.74 | 242.77 | 0.77 | 1.51 | 18.30 | 73.8 | 17% ± 3/2) +<br>16% ∓ 1/2) +<br>11% ± 1/2) +<br>9% ± 5/2) +<br>5% ∓ 3/2) +<br>11% ± 7/2) +<br>13% ± 13/2) + | 1.9          | 168.41 |  |
| 217.38 | 312.76 | 0.16 | 2.13 | 14.14 | 12.8 | 77% ± 13/2) +<br>5% ∓ 1/2) +<br>4% ± 9/2) +<br>4% ± 5/2)                                                    | 2.7          | 217.32 |  |
| 321.68 | 462.82 | 4.11 | 5.97 | 10.96 | 71.2 | 35% ± 11/2) +<br>14% ± 9/2) +<br>14% ∓ 3/2) +<br>8% ± 5/2) +<br>6% ∓ 7/2)                                   | 2.0          | 321.61 |  |
| 401.16 | 577.17 | 0.32 | 3.61 | 10.22 | 87.4 | 32% ± 11/2) +<br>6% ± 7/2) +<br>17% ∓ 7/2) +<br>9% ∓ 5/2) +<br>11% ∓ 9/2) +<br>8% ± 1/2)                    | 0.6          | 399.90 |  |
| 479.94 | 690.52 | 1.50 | 2.19 | 12.40 | 68.2 | 34% ± 9/2) +<br>17% ± 11/2) +<br>16% ∓ 7/2) +<br>11% ∓ 5/2)                                                 | 1.8          | 478.54 |  |
| 546.41 | 786.15 | 0.60 | 1.13 | 15.82 | 81.9 | 19% ± 9/2) +<br>17% ± 7/2) +<br>15% ∓ 3/2) +<br>12% ∓ 5/2) +<br>12% ∓ 1/2) +<br>7% ∓ 7/2)                   | 0.9          | 546.72 |  |
| 623.75 | 897.43 | 0.08 | 0.18 | 19.16 | 77.8 | 25% ± 3/2) +<br>24% ± 5/2) +<br>14% ± 7/2) +<br>18% ± 1/2) +<br>10% ∓ 1/2)                                  | 0.4          | 624.29 |  |

2W.1 with solvent

|        |        |      |      |       |      |                                                                                                            |     |        |
|--------|--------|------|------|-------|------|------------------------------------------------------------------------------------------------------------|-----|--------|
| 0.00   | 0.00   | 0.02 | 0.03 | 19.68 | --   | 97% ± 15/2) +<br>2% ± 11/2)                                                                                | 7.4 | 0.00   |
| 72.43  | 104.21 | 0.17 | 0.21 | 19.55 | 79.8 | 18% ± 3/2) +<br>16% ∓ 1/2) +<br>17% ± 1/2) +<br>13% ± 5/2) +<br>9% ∓ 3/2) +<br>10% ± 7/2) +<br>6% ± 9/2) + | 1.3 | 72.10  |
| 178.26 | 256.48 | 1.42 | 2.15 | 15.34 | 9.5  | 83% ± 13/2) +<br>5% ± 11/2) +<br>2% ± 9/2) +<br>2% ± 5/2)                                                  | 5.8 | 177.74 |
| 249.31 | 358.70 | 3.05 | 6.03 | 11.29 | 74.1 | 24% ± 11/2) +<br>19% ± 9/2) +<br>16% ∓ 3/2) +<br>10% ± 5/2) +<br>7% ∓ 7/2)                                 | 1.8 | 248.74 |
| 324.81 | 467.33 | 0.67 | 5.11 | 11.83 | 76.8 | 28% ± 11/2) +<br>16% ± 7/2) +<br>10% ∓ 7/2) +<br>9% ± 9/2) +<br>8% ∓ 5/2) +<br>5% ∓ 9/2) +<br>5% ± 1/2)    | 1.7 | 323.70 |
| 377.18 | 542.67 | 0.64 | 2.13 | 15.06 | 83.9 | 18% ± 1/2) +<br>16% ± 7/2) +<br>15% ± 3/2) +<br>14% ∓ 5/2) +<br>9% ± 5/2) +<br>9% ± 9/2)                   | 0.8 | 376.02 |
| 429.93 | 618.56 | 0.22 | 1.15 | 16.65 | 52.5 | 37% ± 9/2) +<br>21% ± 11/2) +<br>13% ± 7/2) +<br>7% ∓ 1/2) +<br>6% ± 13/2)                                 | 3.8 | 429.88 |
| 487.61 | 701.56 | 0.25 | 0.63 | 18.93 | 74.1 | 25% ± 5/2) +<br>23% ± 3/2) +<br>21% ± 7/2) +<br>13% ± 1/2) +<br>7% ± 9/2)                                  | 1.9 | 488.10 |

**Table S11.** Electronic structure of **2W** complex calculated with the crystal field parameters obtained from CASSCF-SO at the DFT-optimised structure. Each row corresponds to a Kramers doublet. Last column reports the CASSCF-SO energies.

| Energy (cm <sup>-1</sup> ) | Energy (K) | g1   | g2   | g3    | Angle | Wavefunction                                                                                                                            | <Jz> | Energy <sup>CAS</sup> (cm <sup>-1</sup> ) |
|----------------------------|------------|------|------|-------|-------|-----------------------------------------------------------------------------------------------------------------------------------------|------|-------------------------------------------|
| 0.00                       | 0.00       | 0.04 | 0.07 | 19.63 | --    | 96% ± 15/2> +<br>3% ± 11/2>                                                                                                             | 7.4  | 0.00                                      |
| 66.30                      | 95.39      | 0.31 | 0.35 | 19.38 | 80.7  | 18% ± 3/2> +<br>18% ∓ 1/2> +<br>17% ± 1/2> +<br>11% ± 5/2> +<br>8% ∓ 3/2> +<br>9% ± 7/2> +<br>5% ± 9/2> +                               | 1.2  | 65.85                                     |
| 173.50                     | 249.63     | 2.28 | 2.67 | 14.54 | 10.3  | 80% ± 13/2> +<br>5% ± 11/2> +<br>4% ∓ 1/2> +<br>3% ± 7/2>                                                                               | 5.5  | 171.94                                    |
| 249.07                     | 358.36     | 2.38 | 6.91 | 10.13 | 74.1  | 20% ± 11/2> +<br>18% ± 9/2> +<br>21% ∓ 3/2> +<br>13% ± 5/2>                                                                             | 1.6  | 245.84                                    |
| 317.86                     | 457.32     | 0.56 | 4.03 | 14.25 | 73.1  | 22% ± 11/2> +<br>12% ± 7/2> +<br>6% ∓ 7/2> +<br>10% ± 9/2> +<br>6% ± 1/2> +<br>11% ± 5/2> +<br>11% ± 3/2> +<br>8% ∓ 1/2> +<br>7% ∓ 3/2> | 2.0  | 316.38                                    |
| 338.89                     | 487.59     | 1.46 | 2.80 | 15.78 | 81.2  | 28% ± 1/2> +<br>15% ± 7/2> +<br>9% ± 3/2> +<br>6% ∓ 3/2> +<br>17% ± 5/2> +<br>8% ± 11/2>                                                | 1.0  | 337.73                                    |
| 419.55                     | 603.63     | 0.16 | 0.91 | 17.60 | 48.8  | 34% ± 9/2> +<br>29% ± 11/2> +<br>16% ± 7/2> +<br>8% ± 13/2>                                                                             | 4.4  | 419.74                                    |
| 472.79                     | 680.23     | 0.27 | 0.96 | 18.82 | 69.4  | 23% ± 7/2> +<br>23% ± 5/2> +<br>19% ± 9/2> +<br>16% ± 3/2> +<br>7% ± 1/2>                                                               | 2.5  | 472.73                                    |

**Table S12.** Root mean squared deviation values\* in Angstroms between pairs of crystal and optimized coordinates.

| <b>1Py</b>                                                                                     | <b>1W.1</b> | <b>1W.2</b> | <b>2W.1</b> | <b>2W.2</b> |
|------------------------------------------------------------------------------------------------|-------------|-------------|-------------|-------------|
| 0.33                                                                                           | 0.46        | 0.47        | 0.41        | 0.48        |
| * calculated following Kabsch algorithm <sup>1</sup> as implemented by Charnley <sup>2</sup> . |             |             |             |             |

Given the observed dependency of the electronic structure of compounds **1W** and **2W** we have performed gas-phase molecular geometry optimizations on all compounds with Gaussian09d<sup>3</sup> suite of programs using the PBE<sup>4,5</sup> exchange-correlation functional with cc-pVTZ<sup>6</sup> basis set for all coordinating atoms, cc-pVDZ<sup>6</sup> for the rest of non-metal atoms, the Stuttgart RSC 1997<sup>7</sup> effective core potential (ECP) for the 28 core electrons of yttrium and the corresponding valence basis set for the remaining valence electrons, and Grimme's dispersion corrections.<sup>8-10</sup> To facilitate convergence, dysprosium is substituted by yttrium (where the isotopic mass is set to 162.5, that of the naturally abundant dysprosium), which is justified by their similar ionic radii and the fact that these derivatives are widely found to be structural analogues. Calculation of normal modes was performed by explicit calculation of the Hessian at the optimized geometry, making sure that the forces and displacements are zero and that all frequencies are positive.

<sup>1</sup> W. Kabsch, *Acta Crystallog.*, 1976, **A32**, 922-923

<sup>2</sup> <http://github.com/charnley/rmsd>

<sup>3</sup> M. J. Frisch, et al. Gaussian 09, Revision D.01, Gaussian, Inc., Wallingford CT, 2016

<sup>4</sup> J. P. Perdew, K. Burke and M. Ernzerhof, *Phys. Rev. Lett.*, 1996, **77**, 3865–3868.

<sup>5</sup> J. P. Perdew, K. Burke and M. Ernzerhof, *Phys. Rev. Lett.*, 1997, **78**, 1396–1396.

<sup>6</sup> T. H. Dunning, *J. Chem. Phys.*, 1989, **90**, 1007–1024.

<sup>7</sup> J. M. L. Martin and A. Sundermann, *J. Chem. Phys.*, 2001, **114**, 3408–3420.

<sup>8</sup> S. Grimme, *J. Comput. Chem.*, 2004, **25**, 1463–1473.

<sup>9</sup> S. Grimme, *J. Comput. Chem.*, 2006, **27**, 1787–1799.

<sup>10</sup> S. Grimme, *Wiley Interdiscip. Rev. Comput. Mol. Sci.*, 2011, **1**, 211–228.
